1 **Development of motor neurons and motor activity in zebrafish requires F-actin**  
2 **nucleation by Fmn2b**

3

4 Dhriti Nagar<sup>1</sup>, Blake Carrington<sup>2</sup>, Shawn M Burgess<sup>3</sup> and Aurnab Ghose<sup>1\*</sup>

5

6 <sup>1</sup> Indian Institute of Science Education and Research (IISER) Pune, Dr Homi Bhabha  
7 Road, Pune 411008, INDIA

8 <sup>2</sup> Zebrafish Core, Translational and Functional Genomics Branch, National Human  
9 Genome Research Institute, National Institutes of Health, Bethesda, Maryland, USA

10 <sup>3</sup> Translational and Functional Genomics Branch, National Human Genome Research  
11 Institute (NHGRI), National Institutes of Health (NIH), Bethesda, MD, USA

12

13

14

15

16 \* Correspondence: Dr. Aurnab Ghose, Indian Institute of Science Education and  
17 Research (IISER) Pune, Dr Homi Bhabha Road, Pune 411008, INDIA.

18 Email: [aurnab@iiserpune.ac.in](mailto:aurnab@iiserpune.ac.in)

## 19 **ABSTRACT**

### 20 **Background**

21 Cytoskeletal remodelling plays a pivotal role in the establishment of neuronal  
22 connectivity during development and in plasticity in adults. Mutations in the  
23 cytoskeleton regulatory protein Formin-2 (Fmn2) are associated with  
24 neurodevelopmental disorders like intellectual disability, though its function in  
25 neuronal morphogenesis has not been characterised *in vivo*.

### 26 **Results**

27 Here we develop a loss-of-function model for *fmn2b*, the zebrafish orthologue of Fmn2,  
28 using CRISPR/Cas9-mediated gene editing. *fmn2b* mutants display motor deficits  
29 starting from the earliest motor responses in the embryo. We find that *fmn2b* is  
30 expressed in spinal motor neurons and its loss reduces motor neuron innervation of  
31 the axial muscles without affecting myotome integrity. The translocation of caudal  
32 primary (CaP) motor neuron outgrowth is compromised in *fmn2b* mutants, while rostral  
33 primary (RoP) motor neurons have missing soma or stall at the horizontal myoseptum.  
34 Strikingly, axon collateral branching of the motor neurons is severely compromised  
35 and results in reduced synaptic coverage of the myotome. Rescue experiments  
36 identify the requirement for Fmn2-mediated actin nucleation for motor neuron  
37 outgrowth and arborisation.

### 38 **Conclusions**

39 The zebrafish loss-of-function model of Fmn2 reveals the specific requirement of F-  
40 actin polymerisation by Fmn2 in neuromuscular development. It also underscores the  
41 role of Fmn2 in motor neuropathies, especially as a proportion of individuals  
42 harbouring mutations in Fmn2 present with hypotonia.

## 43 **Keywords**

44 Fmn2b, motor behaviour, motor neurons, axonal branching, actin nucleation

## 45 INTRODUCTION

46 Developing neurons migrate to their predetermined targets, undergo axonogenesis,  
47 pathfinding and eventually arborize to make functional synapses. Cytoskeletal  
48 remodelling allows dynamic interactions of the developing neurons with the  
49 environment during outgrowth, pathfinding and arborization (Dickson, 2002; Lowery  
50 and Van Vactor, 2009; Gordon-Weeks and Fournier, 2014; Flynn and Bradke, 2020)  
51 aided by several actin remodelling proteins (Dent et al., 2011; Kessels et al., 2011;  
52 Lewis et al., 2013; Coles and Bradke, 2015; Armijo-Weingart and Gallo, 2017).

53 Remodelling of actin filaments allows protrusive structures to probe the environment  
54 for cues in the form of growth cone filopodia and axonal and dendritic branches  
55 (Lowery and Van Vactor, 2009; Lewis et al., 2013; Armijo-Weingart and Gallo, 2017;  
56 Menon and Gupton, 2018).

57 In zebrafish, spinal motor neurons exit perpendicular to the spinal cord and traverse  
58 the myotomes to arborize and make synapses onto the axial muscles (Myers et al.,  
59 1986; Westerfield et al., 1986). Adequate innervation of muscles by the motor neurons  
60 is ensured by hemisegment specific outgrowth, pathfinding and arborization. Precise  
61 neuronal morphogenesis of motor neurons is critical for achieving context-specific  
62 synaptic drive at the level of muscles, enabling the organism to execute motor  
63 behaviours.

64 Actin nucleating proteins are a major class of actin remodelling factors and have been  
65 implicated in neuronal morphogenesis. The actin nucleator Cobl localizes to regions  
66 with high actin dynamics and is implicated in the maintenance of neurite branching  
67 (Ahuja et al., 2007). Actin nucleators mediate the local rearrangement of actin  
68 filaments via the formation of dynamic structures like F-actin patches and F-actin blobs

69 and regulate the initiation of protrusions and branching (Ketschek and Gallo, 2010;  
70 Spillane et al., 2011; Spillane and Gallo, 2014; Nithianandam and Chien, 2018; Kundu  
71 et al., 2020). Reports have characterized the role of Dishevelled associated activator  
72 of morphogenesis (Daam) formins in *Drosophila* axonal growth (Matusek et al., 2008;  
73 Prokop et al., 2011) and Daam1a in habenular morphogenesis and IPN connectivity  
74 in zebrafish (Colombo et al., 2013). Another study identified Formin-3 (Form3) in the  
75 maintenance of complex dendritic arbours of nociceptive sensory neurons in  
76 *Drosophila* via microtubule stabilization and adequate organelle trafficking (Das et al.,  
77 2021). However, the function of formin family of actin nucleators in axonal branching  
78 *in vivo* remains elusive.

79 Formin-2 (Fmn2) is part of the FMN family of formins and is known to be involved in  
80 neuronal development. Biallelic mutations in Fmn2 cause neurodevelopmental defects  
81 resulting in intellectual disability and muscle hypotonia in humans (Law et al., 2014).  
82 Primary hippocampal neurons from Fmn2 null mice show defective dendritic spine  
83 morphogenesis (Law et al., 2014) and there is increasing evidence implicating copy  
84 number variations (CNVs) and single nucleotide polymorphisms (SNPs) in Fmn2 in  
85 sporadic Amyotrophic Lateral Sclerosis (SALS) (Schymick et al., 2007; Pamphlett et  
86 al., 2011; Morello et al., 2018). Fmn2 has previously been characterized in outgrowth,  
87 pathfinding (Sahasrabudhe et al., 2016; Ghate et al., 2020; Kundu et al., 2021) and  
88 axonal branching (Kundu et al., 2020) in chick spinal primary neurons *in vitro*.  
89 Depletion of Fmn2 causes reduced growth cone motility and mechanotransduction in  
90 chick spinal primary neurons (Sahasrabudhe et al., 2016; Ghate et al., 2020). Fmn2  
91 regulates the stabilization of actin patches required for the initiation of axonal  
92 branching in cultured chick spinal neurons by insulating the actin patch from actin  
93 depolymerizing factors like ADF (Kundu et al., 2020). Morpholino-mediated transient

94 knockdown of *Fmn2b*, the zebrafish ortholog of *Fmn2*, causes impaired outgrowth of  
95 the spiral fiber neuron commissures in the hindbrain and results in diminished short  
96 latency escape response (Nagar et al., 2021).

97 In this study, we generate *fmn2b* mutants using the CRISPR-Cas9 based gene editing  
98 to assess the contribution of *Fmn2b* in neural circuit development and behaviour and  
99 to improve our understanding of the mechanistic underpinnings of the  
100 neurodevelopmental disorders associated with *Fmn2*.

101 Motor neurons are the final, executory neurons driving motor responses. In zebrafish,  
102 the spinal motor neurons receive synaptic inputs from reticulospinal neurons, including  
103 the Mauthner cell and several hindbrain interneurons, which regulate motor neuron  
104 function in response to stimuli (Bernhardt et al., 1990; Hale et al., 2001; McLean and  
105 Fetcho, 2008). Three subtypes of primary motor neurons are present on either side of  
106 the spinal cord – the Caudal primary (CaP), the Middle primary (MiP) and the Rostral  
107 primary (RoP) – with distinct morphology and muscle targets (Eisen et al., 1986; Myers  
108 et al., 1986; Bernhardt et al., 1990; Melançon et al., 1997; Stifani, 2014). The  
109 myotomes are also innervated by secondary motor neurons which develop after the  
110 primary motor neurons and have less complex arborization fields (Pike et al., 1992;  
111 Beattie et al., 1997; Menelaou and Svoboda, 2009). Motor neurons innervate the  
112 target muscles to form structurally and functionally distinct motor units and regulate  
113 the overall synaptic drive of the muscles during motor behaviours (Saint-Amant and  
114 Drapeau, 1998; Drapeau et al., 2002; Bagnall and McLean, 2014; Bello-Rojas et al.,  
115 2019).

116 This study uncovers the role of the zebrafish orthologue of Formin-2, Fmn2b, in  
117 regulating spinal motor neuron outgrowth and branching *in vivo* and the consequent  
118 effects on motor behaviour.

## 119 RESULTS

### 120 **Generating *fmn2b* CRISPR mutants**

121 Zebrafish has two paralogs of Formin-2, *fmn2a* and *fmn2b*. *fmn2b*, located on  
122 chromosome 12, has higher sequence homology with human Fmn2 compared to  
123 *fmn2a* and has the characteristic Formin Homology 1 (FH1), Formin Homology 2 (FH2)  
124 and Formin Spire Interaction (FSI) domains (Nagar et al., 2021). In contrast, the FH1  
125 domain of *fmn2a* is truncated. As observed in humans, rodents and chicks (Leader  
126 and Leder, 2000; Sahasrabudhe et al., 2016), *fmn2b* mRNA is enriched in the  
127 zebrafish nervous system whereas *fmn2a* shows no detectable expression in the  
128 nervous system of zebrafish (Nagar et al., 2021). In this study, we used the CRISPR-  
129 Cas9 technology to generate mutants of *fmn2b*, the functional ortholog of mammalian  
130 Fmn2 in zebrafish.

131 To generate *fmn2b* knockout zebrafish, sgRNAs targeting the exon 1 of *fmn2b* were  
132 designed using the [CRISPRscan](#) tool (Moreno-Mateos et al., 2015) and cross verified  
133 for high scores using the [ZebrafishGenomics](#) track (LaFave et al., 2014) in UCSC  
134 genome browser. Exon 1 was targeted to ensure that the resulting mutant would lack  
135 the functional domains.

136 The embryos injected with sgRNA and Cas9 mRNA were raised till sexual maturity.  
137 Individual embryos from the injected clutch were outcrossed with wildtype fish of the  
138 opposite sex to obtain eggs that were genotyped using fluorescent PCR (Varshney et  
139 al., 2016). Multiple founder lines with different allelic mutations were identified for  
140 *fmn2b* by fluorescent-PCR. The F1 progeny obtained from the outcross of these  
141 founder lines was raised to adulthood and the siblings were in-crossed. The F2  
142 progeny were raised to adulthood and genotyped using the caudal fin clip method and



143 subsequent Sanger sequencing of the genomic locus flanking the sgRNA-1 target  
144 sequence to determine whether they were heterozygous or homozygous for the  
145 inherited mutant allele.

146 The sgRNA caused various indels near the intended target around 696 bp into the  
147 *fmn2b* cDNA sequence in exon 1, corresponding to 232<sup>nd</sup> amino acid position in the  
148 1454 amino acid long Fmn2b protein sequence. Two alleles causing a 4 bp and a 7  
149 bp deletion, respectively, were selected to obtain homozygous mutants *fmn2b*<sup>Δ4/Δ4</sup> and  
150 *fmn2b*<sup>Δ7/Δ7</sup> (Figure 1 A-B). The 4 bp deletion in the *fmn2b*<sup>Δ4/Δ4</sup> mutant leads to  
151 frameshift variant (p.Leu233TrpfsTer281) with Tryptophan as the first amino acid  
152 changed in place of Leucine at 233<sup>rd</sup> amino acid position causing premature stop  
153 codon at the 281<sup>st</sup> amino acid. The 7 bp deletion acid in the *fmn2b*<sup>Δ7/Δ7</sup> results in the  
154 frameshift variation (p.Val234ThrfsTer280) with Threonine replacing Valine as the  
155 234<sup>th</sup> amino acid and causing a premature stop codon at 280<sup>th</sup> amino acid position  
156 (Figure 1 C). The two homozygous mutant alleles were in-crossed to obtain  
157 heteroallelic *fmn2b* mutants (*fmn2b*<sup>Δ4/Δ7</sup>) and used in subsequent experiments.

158 ***fmn2b* mutants exhibit Spontaneous Tail Coiling (STC) and Touch-Evoked**  
159 **Escape Response (TEER) deficits**

160 The first motor behaviour to appear in the developing zebrafish embryo is spontaneous  
161 tail coiling (STC) which starts around 17 hpf and persists till 27 hpf (Saint-Amant and  
162 Drapeau, 1998; Brustein et al., 2003). We recorded the spontaneous tail coiling in  
163 *fmn2b*<sup>+/+</sup> and *fmn2b*<sup>Δ4/Δ7</sup> embryos at 22 hpf (Movie 1). The frequency of spontaneous  
164 tail coiling was reduced in *fmn2b*<sup>Δ4/Δ7</sup> mutant embryos ( $3.168 \pm 0.314 \text{ min}^{-1}$ ) as  
165 compared to the wild-type *fmn2b*<sup>+/+</sup> embryos ( $5.003 \pm 0.203 \text{ min}^{-1}$ ) (Figure 2 A).  
166 However, the maximum amplitude of tail coiling did not change significantly in the  
167 *fmn2b*<sup>Δ4/Δ7</sup> embryos (Figure 2 B). The decrease of coiling frequency but not the

168 magnitude of coiling indicates that the defects are likely due to deficits in the motor  
169 neuron or the neuromuscular junction (NMJ) function rather than loss of muscle  
170 integrity.

171 As the embryo develops, the motor circuits mature to mediate touch-evoked escape  
172 responses (TEER) beginning at 48 hpf. TEER is typically manifested as a fast C-bend  
173 escape followed by a swimming bout. We performed the TEER assay on *fmn2b*<sup>+/+</sup> and  
174 *fmn2b*<sup>Δ4/Δ7</sup> embryos at 60 hpf (Movie 2) and recorded their response at 200 fps. Both  
175 the distance traversed ( $13.55 \pm 1.06$  mm) and the average speed ( $34.26 \pm 2.785$  mm/s)  
176 of touch-evoked swimming was reduced in 60 hpf *fmn2b*<sup>Δ4/Δ7</sup> embryos as compared  
177 to the distance covered ( $65.31 \pm 4.93$  mm) and swim speed ( $84.37 \pm 3.253$ ) of *fmn2b*<sup>+/+</sup>  
178 embryos (Figure 2 C, D, E). However, the maximum instantaneous speed attained  
179 during the entire swim bout was not significantly different between *fmn2b*<sup>+/+</sup> ( $199.5 \pm$   
180  $7.039$  mm/s) and *fmn2b*<sup>Δ4/Δ7</sup> embryos ( $183.2 \pm 6.245$  mm/s) (Figure 2 F).

181 The comparable maximum tail coiling amplitudes and maximum instantaneous speeds  
182 observed in *fmn2b*<sup>+/+</sup> and *fmn2b*<sup>Δ4/Δ7</sup> embryos suggest abnormal motor neuron  
183 development or NMJ function and is unlikely to involve deficits in the musculature.  
184 Consistent with this, phalloidin staining of the *fmn2b*<sup>Δ4/Δ7</sup> embryos revealed no  
185 structural deformities in the axial muscles compared to the *fmn2b*<sup>+/+</sup> embryos (Figure  
186 S1).

187 ***fmn2b* mRNA is expressed in the spinal cord and spinal motor neurons of**  
188 **zebrafish embryos**

189 The time window of STC and TEER in zebrafish embryos coincides with the outgrowth  
190 and pathfinding of primary motor neurons (Myers et al., 1986). *fmn2b* mRNA was  
191 found to be expressed in the spinal cord 48 hpf onwards suggesting a possible role in

192 the development of spinal neurons (Figure 3 A, B). Previous reports have also reported  
193 *Fmn2* mRNA expression in the spinal cord of chick, mouse and human embryos  
194 (Leader and Leder, 2000; Sahasrabudhe et al., 2016). To explicitly test the expression  
195 of *fmn2b* mRNA in the motor neurons, GFP positive motor neurons were isolated using  
196 Fluorescence-activated cell sorting (FACS) from 24 hpf and 60 hpf *Tg(mnx1:GFP)*  
197 embryos and the expression of *fmn2b* evaluated by RT-PCR. *fmn2b* transcript was  
198 expressed in motor neurons expressing GFP driven by the *Tg(mnx1:GFP)* isolated  
199 from both 24 hpf and 60 hpf embryos (Figure 3 C). Therefore, *fmn2b* is expressed in  
200 the spinal cord and in the spinal motor neurons of zebrafish embryos and could  
201 mediate motor neuron development and function.

#### 202 ***CaP motor neuron outgrowth is slower in *fmn2b* mutants***

203 To test the hypothesis that the motor defects in *fmn2b* mutants may arise due to  
204 deficits in motor neuron morphogenesis, the *fmn2b<sup>Δ4/Δ7</sup>* mutant line was crossed with  
205 the *Tg(mnx1:GFP)* line to obtain homozygous *fmn2b* mutants in the transgenic  
206 background of GFP-labelled motor neurons. The development of motor neurons was  
207 observed from 22 hpf to 26 hpf using time-lapse confocal imaging of the GFP-labelled  
208 neurons (Movie 3). The growth cones of the pioneering caudal primary (CaP) motor  
209 neurons were tracked using the Manual Tracking plugin in ImageJ, and the average  
210 translocation speed was calculated. The *fmn2b<sup>Δ4/Δ7</sup>* embryos showed slow outgrowth  
211 of the CaP neurons (Figure 3 D, E). The growth cone translocation speed of *fmn2b<sup>Δ4/Δ7</sup>*  
212 embryos ( $22.1 \pm 1.575$   $\mu\text{m}/\text{h}$ ) was slower than the *fmn2b<sup>+/+</sup>* embryos ( $28.34 \pm 1.962$   
213  $\mu\text{m}/\text{h}$ ) (Figure 3 F).

#### 214 ***Primary motor neuron outgrowth and branching defects in *fmn2b* mutants***

215 In addition to the slow outgrowth of CaP motor neurons in *fmn2b* mutants, collateral  
216 branches extended by the motor neurons at 24 hpf (Figure 4 A, B) and 60 hpf (Figure  
217 4 G, H) were observed using the *fmn2b* mutant line *fmn2b*<sup>Δ4/Δ7</sup> in the background of  
218 the transgenic line *Tg(mnx1:GFP)*. The embryos were mounted laterally to image the  
219 motor neurons and the images traced and quantified using the NeuronJ plugin in  
220 ImageJ. At 24 hpf, 100% of the hemisegments had the CaP motor neuron soma  
221 present in *fmn2b*<sup>+/+</sup> as well *fmn2b*<sup>Δ4/Δ7</sup> embryos. The branch density along the fascicle  
222 length (Figure 4 E) and the length of the motor fascicle (Figure 4 F) extended by the  
223 primary motor neurons at 24 hpf was found to be reduced in *fmn2b*<sup>Δ4/Δ7</sup> embryos.  
224 Similarly, 60 hpf *fmn2b*<sup>Δ4/Δ7</sup> embryos showed a reduction in the density (Figure 4 K) of  
225 collateral branches along the motor fascicle along with a reduction in the fascicle  
226 length (Figure 4 L). Similar defects were observed in homozygous *fmn2b* mutants with  
227 the *fmn2b*<sup>Δ4</sup> and *fmn2b*<sup>Δ7</sup> alleles (Figure S3).

228 These observations implicate *fmn2b* function in both the outgrowth of the CaP motor  
229 neuron and collateral branching of motor neurons.

### 230 ***F-actin nucleation activity of Fmn2 is required for motor neuron branching***

231 The functional domains characteristic of Formin-2 are conserved across vertebrates  
232 and ectopic expression of full-length mouse Fmn2 (mFmn2) can rescue  
233 neurodevelopmental defects induced by morpholino-mediated knockdown of Fmn2b  
234 in zebrafish (Nagar et al., 2021). To assess if the expression of exogenous Fmn2 could  
235 rescue the outgrowth and branching defects, *mFmn2* mRNA tagged with mCherry was  
236 injected in the *fmn2b*<sup>Δ4/Δ7</sup> mutant embryos at the 1-cell stage. The branch density and  
237 fascicle length defects were rescued in both 24 hpf (Figure 4 C, E, F) and 60 hpf  
238 (Figure 4 I, K, L) mutant embryos.

239 F-actin nucleation is the canonical function of formins, including Fmn2, and is  
240 mediated by the FH2 domain (Goode and Eck, 2007; Quinlan et al., 2007; Yoo et al.,  
241 2015). The FH2 domain is conserved across phyla, including zebrafish (Nagar et al.,  
242 2021). A conserved isoleucine residue (at position 1226 in mouse Fmn2) is known to  
243 be critical for actin nucleation (Quinlan et al., 2007; Roth-Johnson et al., 2014; Kundu  
244 et al., 2020). Clustal omega alignment of the conserved isoleucine residue is shown  
245 in Figure S2. To test if actin nucleation by Fmn2b is required in zebrafish motor neuron  
246 morphogenesis, an F-actin nucleation dead version of mFmn2 with a point mutation  
247 converting the Isoleucine at 1226 amino acid position to Alanine (mFmn2-I1226A) was  
248 used. The mRNA for mFmn2-I1226A tagged with mCherry was injected in the  
249 *fmn2b<sup>Δ4/Δ7</sup>* embryos at the 1-cell stage and the motor neuron development was  
250 analyzed.

251 The *mFmn2-I1226A* mRNA injected 24 hpf (Figure 4 D, E, F) and 60 hpf (Figure 4 J,  
252 K, L) mutant embryos continue to exhibit the outgrowth and branching defects similar  
253 to the *fmn2b<sup>Δ4/Δ7</sup>* embryos. Rescue of phenotype exhibited by the *fmn2b<sup>Δ4/Δ7</sup>* mutants  
254 by full-length mFmn2 but not the nucleation dead version, mFmn2-I1226A points  
255 towards the conserved function of Fmn2 in motor neuron development and highlights  
256 the significance of F-actin nucleation by Fmn2 in outgrowth and branching of motor  
257 neurons.

258 ***Rostral Primary (RoP) motor neuron development is compromised in *fmn2b****  
259 ***mutants***

260 Despite slower outgrowth rates and reduced branching in *fmn2b<sup>Δ4/Δ7</sup>* embryos, the  
261 CaP fascicle eventually reaches the extremity of the ventral musculature in the  
262 zebrafish flank. On the contrary, another class of primary motor neurons, the Rostral  
263 primary (RoP) motor neurons which typically project to the mid-dorsal and mid-ventral

264 musculature (Bagnall and McLean, 2014; Bello-Rojas et al., 2019), are permanently  
265 affected in *fmn2b*<sup>Δ4/Δ7</sup> embryos. The RoP soma are located at their predetermined site  
266 adjacent to the CaP and VaP cell body cluster in the spinal cord. The cell bodies of  
267 primary motor neurons are distinctly recognizable at 24 hpf.

268 On examining the 24 hpf embryos, the RoP cell body was found to be missing in *fmn2b*  
269 mutants. Compared to 2.5% of the hemisegments in *fmn2b*<sup>+/+</sup> embryos, 46.87% of the  
270 hemisegments in *fmn2b*<sup>Δ4/Δ7</sup> embryos did not have the RoP cell body. Injection of 1-  
271 cell stage *fmn2b*<sup>Δ4/Δ7</sup> embryos with *mFmn2* mRNA rescued this defect with only 2.85%  
272 hemisegments lacking RoP soma. However, the actin nucleation dead *mFmn2-I1226A*  
273 mRNA failed to rescue the loss of RoP soma in *fmn2b* mutants and 43.75% of the  
274 hemisegments continued to show loss of RoP soma (Figure 5 A-F).

275 At 60 hpf, the RoP motor neurons innervate their target in the mid-dorsal and mid-  
276 ventral musculature. The RoP motor neurons in *fmn2b*<sup>Δ4/Δ7</sup> mutants showed two major  
277 types of defects, absence of RoP outgrowth and stalling of RoP at the choice point  
278 near the horizontal myoseptum (HMS), where the RoP axons take a sharp lateral turn.

279 In the *fmn2b* mutant embryos, 91.3% of the hemisegments analyzed showed little to  
280 no lateral innervation. Of these, 44.35% of the hemisegments displayed defasciculated  
281 axons near the horizontal myoseptum, which acts as a choice point for the RoP axons  
282 to turn laterally. The hemisegments with defasciculated axons were classified as  
283 stalled RoP axons. Similar defects in RoP-like secondary motor neurons have been  
284 reported to occur due to depletion of Kif1b and Fidgetin like-1 in zebrafish (Fassier et  
285 al., 2018; Atkins et al., 2019). However, 46.95% of hemisegments had no RoP  
286 innervation altogether and were classified as RoP absent. Only 8.7% hemisegments  
287 showed the stereotypical RoP innervation and were classified as RoP present. In the  
288 *fmn2b*<sup>+/+</sup> embryos, only 3.15% of the hemisegments quantified showed RoP stalling

289 defects, and the rest had stereotypical innervation by the RoP neurons. The RoP  
290 stalling and outgrowth defects were rescued by injection of full-length *mFmn2* mRNA  
291 with only 10.16% hemisegments with RoP stalling and 8.47% hemisegments with RoP  
292 outgrowth defects. On the other hand, RoP defects persisted in the *fmn2b<sup>Δ4/Δ7</sup>*  
293 embryos injected with *mFmn2-I1226A* mRNA, with 18.3% of hemisegments having  
294 stalled RoP axons and 81.7% without RoP innervation (Figure 5 G-L).

295 Collectively, these results indicate that *fmn2b* has pleiotropic effects on RoP  
296 development dependent on F-actin nucleation function. The deficits are at the level of  
297 loss of RoP soma, deficits in RoP axonogenesis and stalling at the horizontal  
298 myoseptum choice point.

299 ***Overexpression of Fmn2 but not the nucleation dead mutant increases collateral***  
300 ***branching in motor neurons***

301 The role of *fmn2b* in motor neuron development has been established so far by  
302 observing *fmn2b* mutants, where the loss of Fmn2b in motor neurons causes a  
303 reduction in outgrowth and branching. Overexpression of mouse Fmn2 was employed  
304 in wildtype embryos to test the phenotypes in the context of Fmn2 gain of function.  
305 The embryos overexpressing mFmn2 showed increased branching, but  
306 overexpression of the nucleation dead mFmn2-I1226A did not cause any significant  
307 changes and was comparable to the wild-type embryos (Figure 6 A, B, E, F). The  
308 branch density was found to be increased in mFmn2 mRNA injected embryos at 24  
309 hpf as well as 60 hpf but not in mFmn2-I1226A mRNA injected group (Figure 6 C, G).  
310 Interestingly, in 24 hpf embryos, the fascicle length was not significantly different in  
311 embryos overexpressing mFmn2 but was found to be decreased in embryos  
312 overexpressing mFmn2-I1226A. In 60 hpf embryos, the fascicle length was slightly

313 increased in the mFmn2 overexpression group but remain unaffected in the mFmn2-  
314 I1226A overexpression group (Figure 6 D, H).

315 However, quantification of RoP soma and RoP axon outgrowth phenotypes in the  
316 *fmn2b*<sup>+/+</sup> embryos overexpressing mFmn2 and mFmn2-I1226A did not reveal any  
317 significant changes (Figure S4).

### 318 ***Neuromuscular Junction (NMJ) development in *fmn2b* mutants***

319 Primary motor neurons innervate the fast-twitch muscles and form functional synapses  
320 by 48 hpf. To visualize the neuromuscular junctions (NMJ), double immunostaining of  
321 whole-mount 60 hpf embryos with *znp-1* antibody (presynaptic marker) and  $\alpha$ -  
322 bungarotoxin (post-synaptic marker) were undertaken. The co-localization of the pre-  
323 and post-synaptic markers revealed the engaged NMJ synapses in *fmn2b*<sup>+/+</sup> and  
324 *fmn2b* <sup>$\Delta 4/\Delta 7$</sup>  embryos (Figure 7 A, B). Synapses (co-localization of *znp-1* and  $\alpha$ -  
325 bungarotoxin signals) along the neuronal arbours were quantified using the  
326 SynapCountJ plugin in Fiji. The number of synapses identified was normalized to the  
327 area of the myotome corresponding to one somite and the length of the neuronal  
328 arbour.

329 The *fmn2b* <sup>$\Delta 4/\Delta 7$</sup>  mutants show reduced synaptic coverage of the myotomes compared  
330 to *fmn2b*<sup>+/+</sup> embryos (Figure 7 C). This result is consistent with previous observations  
331 of reduced outgrowth and branching density, and therefore the attenuated occupancy  
332 of myotome area, of motor neurons.

333 However, the number of synapses normalized to the arbour length was found to be  
334 comparable (Figure 7 D). Thus, while the ability of motor neurons to form synapses is  
335 intact in *fmn2b* mutants, the dramatically reduced arborization results in an effective  
336 reduction in the total number of synapses per myotome. The locomotor defects



337 observed in *fmn2b* mutants is consistent with the decrease in the total number of  
338 synapses per myotome leading to insufficient activation of the myotome.

## 339 DISCUSSION

340 Mutations, including loss-of-function mutations, in *Fmn2* have been associated with  
341 intellectual disability, sensory dysfunction, age-associated cognitive decline (Perrone  
342 et al., 2012; Law et al., 2014; Agís-Balboa et al., 2017; Marco et al., 2018; Gorukmez  
343 et al., 2020). Interestingly, some affected individuals also develop hypotonia (Law et  
344 al). Further, mutations in *Fmn2* have also been associated with sporadic amyotrophic  
345 lateral sclerosis in multiple studies (Schymick et al., 2007; Pamphlett et al., 2011;  
346 Morello et al., 2018). These associations suggest a possible involvement of *Fmn2* in  
347 motor neuron development and function.

348 In this study, we generated *fmn2b* mutants using the CRISPR-Cas9 system (Figure 1)  
349 and found locomotor deficits in the homozygous mutants. *The fmn2b* mutants  
350 displayed deficits right from the earliest motor behaviours (STC at 22 hpf; Figure 2) to  
351 later stages where the development of the embryonic neural circuits is complete  
352 (TEER at 60 hpf; Figure 2). *fmn2b* mRNA expression was also detected in motor  
353 neurons and the spinal cord (Figure 3). Systematic evaluation of the primary spinal  
354 motor neurons revealed defects in the outgrowth of the CaP motor neurons. Live  
355 imaging indicated that the growth cone translocation velocity was reduced in  
356 *fmn2b<sup>Δ4/Δ7</sup>* embryos (Figure 3).

357 Recent *in vitro* studies in chick spinal neurons implicates *Fmn2* in growth cone  
358 translocation. These studies implicate *Fmn2* in mediating a molecular clutch that  
359 stabilizes the contact sites between the growth cone and the extracellular matrix and  
360 regulates the generation of traction forces required for outgrowth (Sahasrabudhe et  
361 al., 2016; Ghate et al., 2020). Additionally, *Fmn2* facilitates the stabilization of  
362 protrusive processes, like growth cone filopodia, by coupling exploratory microtubules

363 with the F-actin cytoskeleton (Kundu et al., 2021). Consistent with this, the depletion  
364 of Fmn2 reveals altered microtubule dynamics in the growth cones of zebrafish Rohon-  
365 Beard neurons *in vivo*. Similar mechanisms involving actin and microtubule  
366 remodelling could be involved in the translocation of CaP growth cones in zebrafish.

367 Even more striking than the delayed outgrowth rates of CaP motor neurons, the  
368 development of collateral branches which provide synaptic coverage of the entire  
369 muscle field was severely affected (Figure 4). The staggered development of spinal  
370 motor neurons in two phases allowed us to selectively look at the innervation of  
371 muscles by primary motor neurons at 24 hpf and collectively look at primary and  
372 secondary motor neuron innervation at 60 hpf. In addition, the 60 hpf embryos have  
373 elaborate branching and fully functional NMJ synapses allowing characterization of  
374 *fmn2b* in outgrowth, branching and synapse formation in motor neurons.

375 In 24 hpf *fmn2b* mutant embryos, branch density along the fascicle extended by the  
376 primary motor neurons and the fascicle length itself was reduced, suggesting a  
377 decrease in the innervation of the target fast muscle fibers (Figure 4). Similarly, the 60  
378 hpf *fmn2b*<sup>Δ4/Δ7</sup> embryos have reduced branch density and fascicle outgrowth  
379 compared to wild-type embryos and are likely to result in reduced speed and distance  
380 covered by *fmn2b* mutants (Figure 4). Deficits in motor neuron outgrowth and collateral  
381 branching at both 24 hpf and 60 hpf was rescued by overexpressing mouse full length  
382 Fmn2 in the *fmn2b* homozygous mutants (Figure 4).

383 Axon collateral branching is a finely regulated multi-step process initiated by the rapid  
384 assembly of F-actin resulting in a filopodia-like protrusion from the axonal shaft  
385 (Ketschek and Gallo, 2010; Gallo, 2011, 2016; Coles and Bradke, 2015; Ketschek et  
386 al., 2015; Armijo-Weingart and Gallo, 2017; Menon and Gupton, 2018). Further  
387 cytoskeleton remodelling involving both the actin and microtubule cytoskeletons

388 stabilize the protrusion and extend it to a collateral branch (Gallo, 2011, 2016; Armijo-  
389 Weingart and Gallo, 2017). The formation of the lateral protrusion from the axonal  
390 shaft is a major rate-limiting step in collateral branching and is initiated by the  
391 development of a juxtamembrane F-actin patch. *In vitro* studies implicate several actin  
392 binding proteins in regulating axonal F-actin patches. These include the actin  
393 nucleating Arp2/3 complex, Drebrin, WVE-1/WAVE regulatory complex (WRC) and  
394 cortactin (Spillane et al., 2011; Hu et al., 2012; Chia et al., 2014; Spillane and Gallo,  
395 2014; Ketschek et al., 2016; Balasanyan et al., 2017). Recently, Fmn2 has been  
396 implicated in collateral branch formation in chick spinal neurons *in vitro*. Fmn2 appears  
397 to regulate the lifetime of axonal F-actin patches and consequently the probability of  
398 branch initiation (Kundu et al., 2020).

399 The F-actin nucleation and elongation activity of Fmn2 has been characterized *in vitro*  
400 (Montaville et al., 2014, 2016). Abrogation of F-actin nucleation activity of Fmn2 can  
401 be achieved by mutating a conserved Isoleucine residue in the FH2 domain to Alanine  
402 (Quinlan et al., 2007; Roth-Johnson et al., 2014; Kundu et al., 2020). We employed  
403 the full-length mouse Fmn2 bearing the isoleucine to alanine mutation (mFmn2-  
404 I1226A) in rescue experiments to test if the F-actin nucleating/elongating activity is  
405 necessary for motor neuron development.

406 Expression of mFmn2-I1226A in the *fmn2b* mutants could not rescue the outgrowth  
407 and branching defects of the motor neurons in 24 hpf and 60 hpf embryos (Figure 4).  
408 The failure of mFmn2-I1226A in rescuing the defects underscores the significance of  
409 the actin nucleating activity of Fmn2b in motor neuron outgrowth and branching  
410 consistent with reports from primary neuronal cultures of chick spinal cord reported  
411 previously (Kundu et al., 2020). Therefore, the motor neuron development in zebrafish  
412 is dependent on the F-actin nucleation activity of Fmn2b.

413 Loss of *fmn2b* had pleiotropic effects on the development of the RoP motor neuron.  
414 The RoP soma and RoP outgrowth were severely affected in *fmn2b* mutants. At 24  
415 hpf, multiple hemisegments in *fmn2b* mutants did not have RoP soma at its  
416 characteristic position in the spinal cord (Figure 5). The role of Fmn2 in the regulation  
417 of differentiation or specification of progenitors is not formally tested despite several  
418 studies indirectly indicating pathways involving Fmn2 in cell differentiation. In a recent  
419 report, Fmn2 has been shown to cause neural progenitor differentiation defects Fmn2  
420 and Flna double knockout mice in a synergistic manner (Lian et al., 2016). The  
421 absence of RoP soma in zebrafish *fmn2b* mutants may indicate a possible role of  
422 *fmn2b* in neural progenitor specification and/or differentiation. The RoP soma was  
423 seen in the expected location in *fmn2b*<sup>Δ4/Δ7</sup> embryos injected with mFmn2 mRNA but  
424 the defect could not be rescued by the injection of mFmn2-I1226A mRNA.  
425 Interestingly, the F-actin nucleating activity of Fmn2 is required for the differentiation  
426 of motor neuron progenitors or their specification. These results open up new  
427 possibilities to uncover the mechanistic role of Fmn2 in neural development.

428 In wild-type zebrafish embryos, the lateral projections from RoP motor neurons and  
429 follower secondary motor neurons begin outgrowth later than CaP and MiP neurons  
430 (Kuwada, 1993; Liu et al., 2016). In 60 hpf *fmn2b* mutants, the side branches of RoP  
431 motor neurons innervating the horizontal myoseptum were either not detected (46%  
432 embryos) or appeared to be stalled at the choice point (44% embryos), i.e., the  
433 horizontal myoseptum (Figure 5). RoP-like secondary motor neurons, which follow the  
434 same trajectory as RoP primary motor neurons have previously been shown to have  
435 pathfinding and stalling defects at the horizontal myoseptum in Fidgetin like-1 and  
436 Kif1b mutants (Fassier et al., 2018; Atkins et al., 2019). Similarly, the stalled RoP  
437 axons appear defasciculated in 60 hpf *fmn2b* mutants

438 One of the factors contributing to RoP outgrowth defects leading to the absence of  
439 RoP innervation in *fmn2b* mutants could be the lack of RoP soma as seen in 24 hpf  
440 mutant embryos. Further, the RoP stalling defect implicates Fmn2b in axonal  
441 pathfinding in response to guidance cues at the choice point. RoP outgrowth and  
442 stalling together caused a noticeable reduction in the innervation of the mid-dorsal and  
443 mid-ventral region of the axial myotome. The RoP may be more severely affected than  
444 the CaP neurons due to their late axonogenesis concomitant with the pleiotropic  
445 function and late expression of *fmn2b* in the spinal cord at 48 hpf.

446 Intriguingly, the overexpression of mouse Fmn2 in *fmn2b*<sup>+/+</sup> (wild-type) embryos  
447 causes opposite effects as compared to *fmn2b* knockout manifested as  
448 hyperbranching. This implies a significant role for *fmn2b* in regulating the collateral  
449 branching of motor neurons. Further, overexpression of the nucleation dead version  
450 of mFmn2 does not result in increased branch density and underscores the  
451 involvement of actin nucleation activity of Fmn2 (Figure 6).

452 Analysis of NMJ synapses using znp-1 and  $\alpha$ -bungarotoxin double staining in *fmn2b*  
453 mutants showed no changes in the number of synapses along the total length of the  
454 motor neuron branches but showed a reduction in the total number of synapses when  
455 normalized to the area of the target myotome. We suggest that the Fmn2b has a  
456 primary role in regulating motor neuron branching and not in the formation of NMJ  
457 synapses. The behavioural defects in *fmn2b* mutants are likely due to the muscles not  
458 receiving sufficient input due to inadequate branching (Figure 7).

459 In a recent study, prolonged exposure of zebrafish larvae to strong and variable water  
460 currents caused upregulation of Fmn2b (Langebeck-Jensen et al., 2019). The rapid  
461 upregulation of Fmn2b in response to environmental stressors involving swimming and  
462 force generation in larvae with pre-established motor neural circuits invoke the

463 possible involvement of *fmn2b* in neuronal plasticity and requires systematic  
464 investigation.

465 Taken together, the zebrafish model of Fmn2 loss-of-function offers unexpected  
466 insight into spinal motor neuron development and innervation of axial muscles. In  
467 addition to identifying the requirement of actin polymerization by Fmn2 in motor neuron  
468 morphogenesis and motor outputs, it highlights the central role of cytoskeleton  
469 remodelling in motor neuron homeostasis and the development of neuropathies.

## 470 **METHODS**

### 471 **Zebrafish maintenance and procedures**

472 All protocols used in this study were approved by the Institutional Animal Ethics  
473 Committee and the Institutional Biosafety Committee of IISER Pune or a National  
474 Human Genome Research Institute (NHGRI/NIH) Animal Care and Use Committee  
475 approved animal study protocol. The TAB5 wildtype strain of zebrafish was used for  
476 all the experiments including generation of CRISPR mutants. The TAB5 strain was  
477 used for all the wildtype outcrosses. Breeding pairs of adult zebrafish were maintained  
478 in recirculating aquaria (Techniplast) under a 14h-10h light-dark cycle. The  
479 temperature was maintained at 28.5°C and the pH was buffered between 7.2 to 7.8.  
480 The breeding adults were crossed to obtain embryos which were collected and grown  
481 in E3 buffer and used at different stages of development as indicated (Kimmel et al.,  
482 1995). For immunostaining and live imaging experiments, the buffer was  
483 supplemented with 0.003% Phenylthiourea (PTU; Sigma) to remove pigmentation  
484 from the skin. The transgenic line *Tg(mnx1:GFP)* was used to visualize motor neurons  
485 wherein the *mnx1* promoter specific to motor neurons drives GFP expression  
486 (Flanagan-Steet et al., 2005).

### 487 **Whole mount in situ hybridization**

488 The RNA probes and procedure used for whole mount *in situ* hybridization  
489 experiments have been described previously (Nagar et al., 2021).

### 490 **Isolation of motor neurons from transgenic embryos, FACS, RT-PCR**

491 Single cell suspension was made from around 200 *Tg(mnx1:GFP)* embryos as  
492 previously described (Bresciani et al., 2018). Briefly, the embryos were dissociated by  
493 trypsinization and filtering through a 70 µm sieve to obtain single cell suspension in



494 1X DMEM containing 10% FBS. The cells were sorted using a BD Biosciences  
495 fluorescence-activated cell sorting (FACS) equipment selecting cells expressing GFP,  
496 i.e., the motor neurons. RNA was extracted using Qiagen RNeasy Kit and cDNA was  
497 prepared using the SuperScript IV RT Kit (ThermoFisher). The cDNA was used for  
498 amplifying *fmn2b* transcripts in the *mnx1* positive motor neurons. Primers and PCR  
499 protocol used to test the presence of *fmn2b* transcripts in motor neurons tagged by  
500 *Tg(mnx1:GFP)* were the same as the ones used for amplification of ISH probes from  
501 cDNA.

## 502 **RNA injections**

503 Capped mRNA was synthesized using the HiScribe™ T7 ARCA mRNA Kit (with  
504 tailing) from linearized DNA template containing T7 promoter sequence upstream of  
505 the mFmn2-mCherry and mFmn2-I1226A-mCherry constructs. The transcribed mRNA  
506 was purified using RNeasy MinElute Cleanup Kit (Qiagen). 150 pg of mFmn2-mCherry  
507 and mFmn2-I1226A-mCherry mRNA was injected in the zebrafish embryos of desired  
508 genotype at 1-cell stage.

## 509 **sgRNA and Cas9 injections for CRISPR mutants**

510 sgRNA targeting exon 1 of *fmn2b* was designed as previously described (Varshney et  
511 al., 2016). T7 HiScribe kit (NEB) was used to transcribe the sgRNA DNA template with  
512 the appended T7 promoter. The sgRNA was purified using ZymoResearch clean up  
513 columns. T3 mMessage mMachine RNA synthesis kit (Ambion) was used to  
514 synthesize capped Cas9 mRNA from the pT3TS-nCas9n plasmid (kind gift from Dr  
515 Wenbiao Chen; Addgene plasmid # 46757). The synthesized Cas9 mRNA was  
516 purified using the RNeasy MinElute Cleanup Kit (Qiagen). 30 pg sgRNA and 300 pg

517 Cas9 mRNA was injected in zebrafish embryos at 1 cell stage. The sequence of  
518 sgRNA is given below.

519 Fmn2b\_sgRNA : GGGCGAGAGGCCTCGGCTGG

520 (ENSDARG00000061778.6; 12:47451436-47451459, plus strand)

### 521 **Genotyping CRISPR mutants**

522 For identifying founder lines for *fmn2b* mutants, fluorescent PCR was performed and  
523 analyzed by capillary gel electrophoresis using the ABI GeneAnalyzer 3730XL, as  
524 previously described (Carrington et al., 2015; Varshney et al., 2015, 2016).  
525 Identification of homozygous mutant lines was also done using Sanger sequencing.  
526 Two zebrafish mutant lines with alleles causing a premature stop codon due to a  
527 frameshift mutation were established. The homozygous mutants were crossed to each  
528 other to obtain a heteroallelic mutant line for *fmn2b* to reduce the effect of any  
529 background mutations in the two mutant lines due to unintended off-target effects.  
530 Primer sequences for sanger sequencing of genomic DNA amplicons from crispants  
531 are as follows:

Fmn2b\_PCR\_F                      AAGCGTAAGAACCAGAATAAGC

Fmn2b\_PCR\_R                      TCATCCGAATGGCTTGC

532

### 533 **Whole mount immunostaining**

534 PTU treated embryos were collected at desired stages and fixed in 4% formaldehyde  
535 overnight at 4°C. For staining actin structures, fixed embryos were washed with 0.5%  
536 PBS-Triton, permeabilized with 2% PBS-Triton for 2 hours at room temperature and

537 then incubated in Phalloidin Alexa Fluor 568 diluted 1:50 in 2% PBS Triton overnight  
538 at 4 °C in dark.

### 539 **Neuromuscular junction labelling and quantification**

540 For neuromuscular junction staining of embryos, znp-1 antibody (DSHB; 1:100) and  
541 Tetramethyl Rhodamine labelled  $\alpha$ -bungarotoxin (Invitrogen; 1:200) were used as pre-  
542 synaptic and post-synaptic markers respectively. Whole mount immunostaining  
543 procedures described in previous section were followed as described. The synapses  
544 were counted using the SynapCountJ plugin after making the traces of arbour in  
545 NeuronJ plugin in Fiji.

### 546 **Fluorescence microscopy, live imaging and mounting procedure**

547 All the microscopic imaging was performed on the inverted LSM 780 confocal  
548 microscope (Zeiss) with a 25x oil immersion objective (NA 1.4). For imaging of the  
549 fixed samples, the embryos were cleared in 50% glycerol and mounted dorsal side  
550 down on a glass bottom petri dish using low gelling agarose (Sigma). For live imaging,  
551 the live embryos were mounted laterally in 0.5% low melt point agarose (Sigma)  
552 containing 0.003% MS-222 (Sigma) in a coverslip bottom 35 mm petri plate.

553 The growth cone of motor neurons was visualized using the *Tg(mnx1:GFP)* in wildtype  
554 or mutant background. The embryos were imaged starting at 22 hpf for 4-6 hours every  
555 3 minutes. The growth cone translocation was analyzed using the Manual tracking  
556 plugin in Fiji to track the movement of the leading edge across time. The coordinates  
557 obtained were analyzed using the ibidi Chemotaxis tool to calculate the average  
558 growth cone translocation speed.

### 559 **Behaviour experiment set up and behaviour analysis**

560 *Spontaneous tail coiling (STC) assay*

561 Embryos 22 hpf within their chorions were transferred to a 35 mm petri plate containing  
562 E3 buffer at of 28.5°C. A video camera (AVT Pike, F-032B) was used to record the  
563 spontaneous tail coiling behaviour of the embryos for a time period of 3 minutes at 15  
564 fps. The videos were processed and analysed using a MATLAB script ZebraSTM  
565 published previously (González-Fraga et al., 2019).

#### 566 *Touch evoked escape response (TEER) assay*

567 60 hpf zebrafish embryos were housed in a 35 mm petri plate containing pre-warmed  
568 E3 buffer at 28.5 °C. A tuberculin needle was repurposed by attaching a soft nylon  
569 fiber in front of the syringe holding the needle, to deliver tactile stimuli to zebrafish  
570 embryos. A soft touch was delivered to the head of the zebrafish once and their  
571 behaviour was recorded using a high-speed video camera (AVT Pike F-032B) at 208  
572 fps. The videos obtained were analyzed using the Manual tracking plugin in Fiji to mark  
573 the trajectories of the zebrafish embryos upon receiving the tactile stimulus. The tracks  
574 were further analyzed using the ibidi Chemotaxis tool to calculate the distance  
575 travelled and average speed. The maximum instantaneous speed was calculated  
576 manually from the coordinates obtained from the manual tracking output.

#### 577 **Figures and Statistical analysis**

578 The analysis was performed for all the experiments in a genotype blinded manner.  
579 Image analysis was performed using Fiji and the Figure panels were assembled using  
580 Inkscape. The Violin plots were plotted in GraphPad Prism 8 and indicated statistical  
581 tests were performed using GraphPad Prism 8. The data is represented as mean ±  
582 SEM in the text. The statistical test used and the p values are indicated in the Figure  
583 legends.

584

585 **AVAILABILITY OF DATA AND MATERIALS**

586 The data generated and analyzed in this study are included in this article and the  
587 additional information files. More information can be made available upon reasonable  
588 request to the corresponding author.

589 **FIGURES**

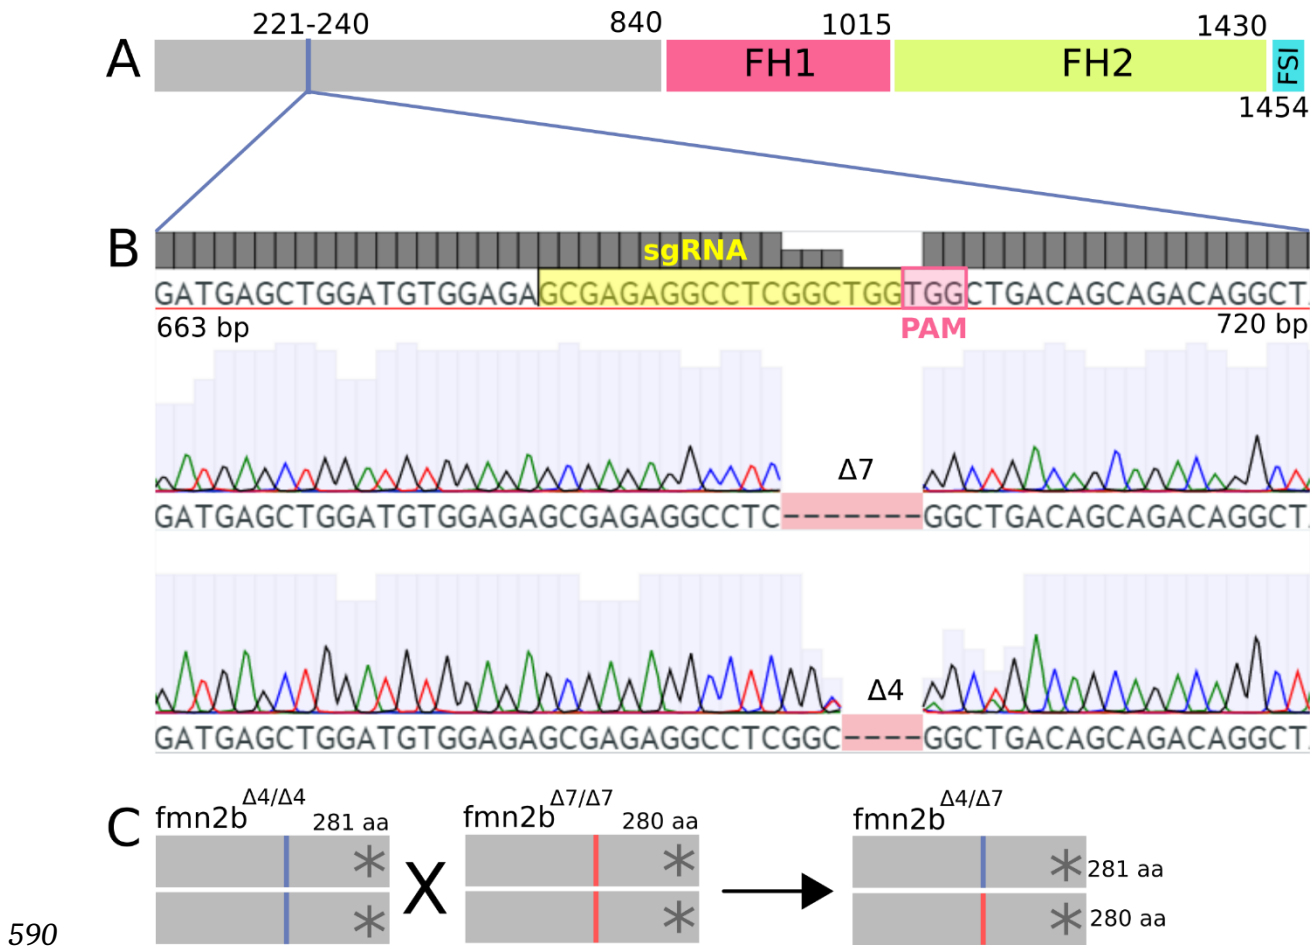

591 **Figure 1. Generation of *fmn2b* CRISPR mutants. A)** Schematic of the *fmn2b* protein  
 592 indicating the functional protein domains and the site of *fmn2b* sgRNA-1. The FH1  
 593 domain spans the 841-1015 amino acids, FH2 domain spans the 1016-1430 amino  
 594 acids and the FSI domain spans the 1431-1454 amino acids. **B)** Genomic locus from  
 595 *fmn2b* exon 1 starting from 663 bp to 720 bp (corresponding to 221-240 amino acids).  
 596 The sgRNA sequence is highlighted in yellow followed by the PAM sequence in pink.  
 597 Representative chromatograms of amplicons sequenced from homozygous CRISPR  
 598 mutants for *fmn2b* show two alleles with a 7 bp and a 4 bp deletion, respectively. The  
 599 two alleles are denoted as *fmn2b*<sup>Δ7</sup> (p.Leu233TrpfsTer281) and *fmn2b*<sup>Δ4</sup>  
 600 (p.Val234ThrfsTer280). **C)** Schematic outlining the generation of *fmn2b* homozygous

601 mutants. Fish homozygous for two alleles are denoted as  $fmn2b^{\Delta7/\Delta7}$  and  $fmn2b^{\Delta4/\Delta4}$ ,  
602 the heteroallelic combination is denoted as  $fmn2b^{\Delta4/\Delta7}$ .

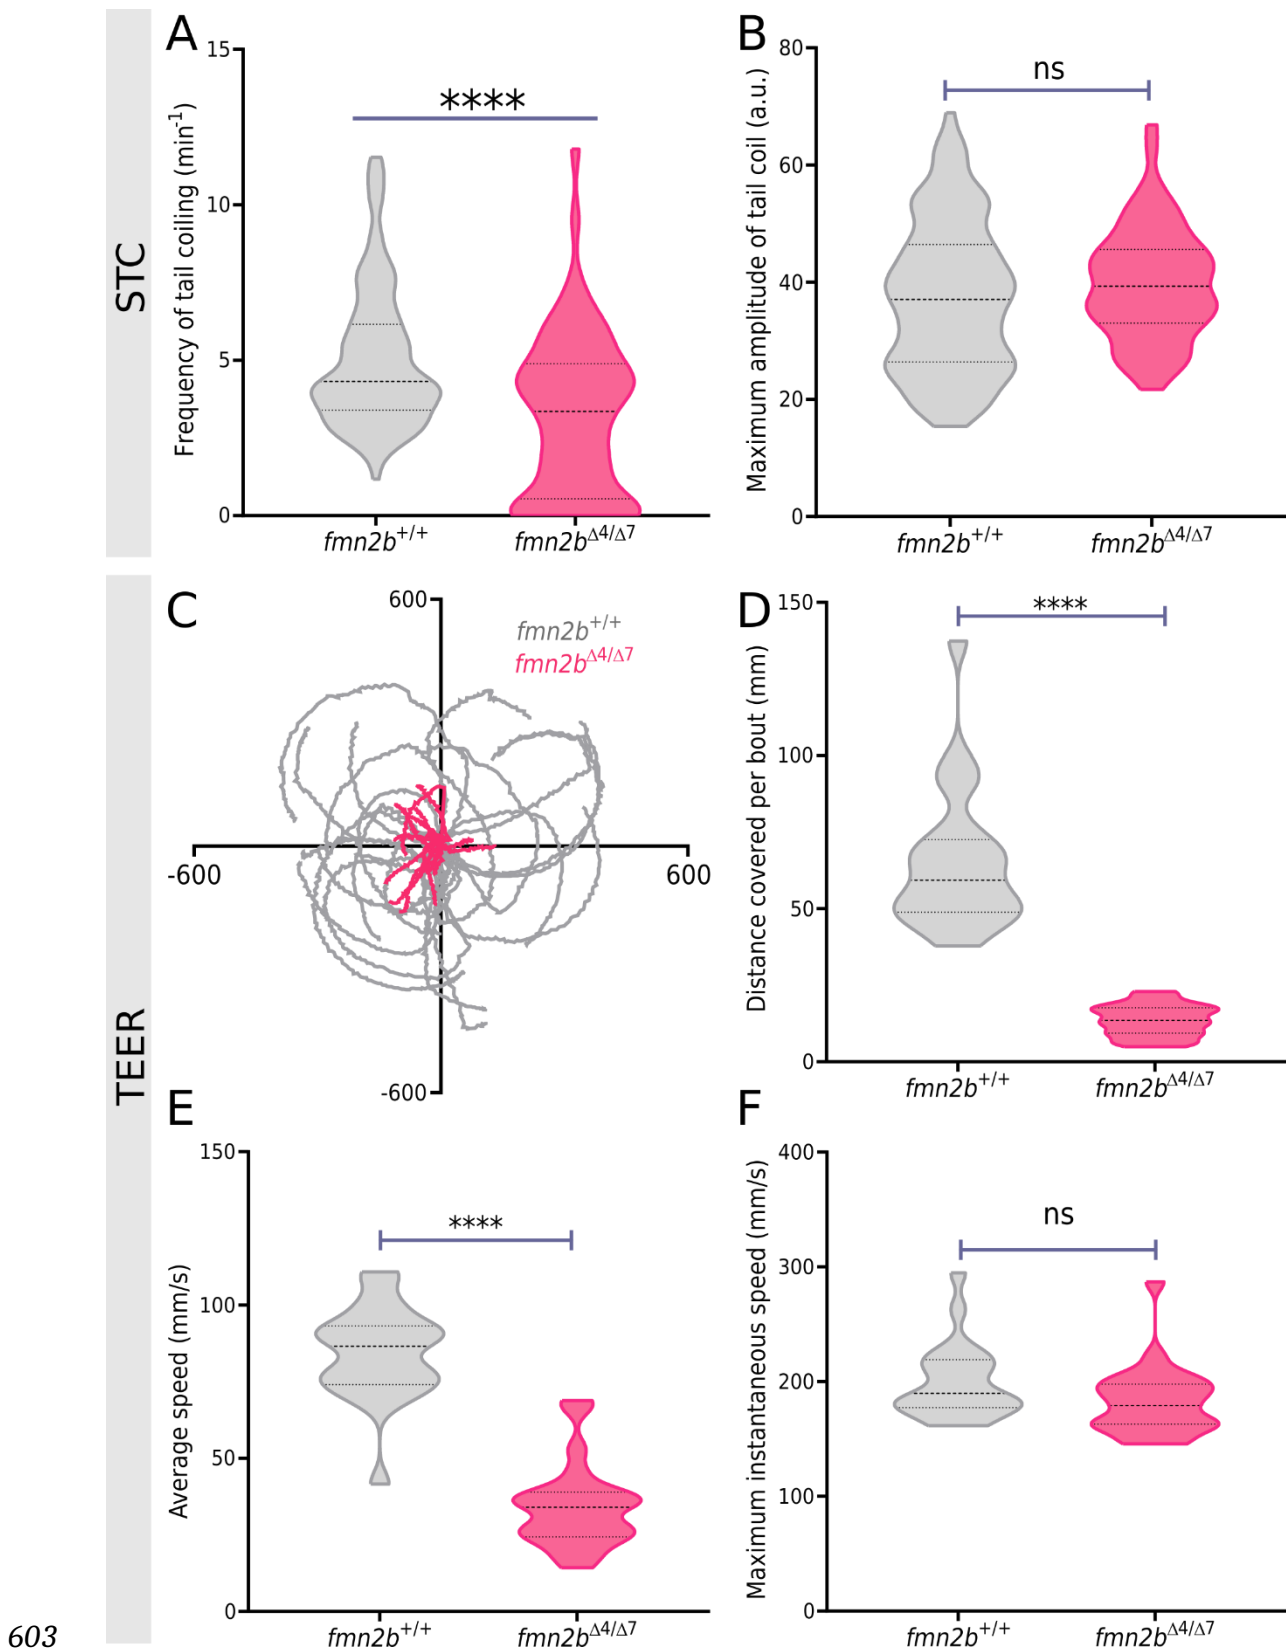

**Figure 2. *fmn2b* mutants exhibit motor defects. A)** Spontaneous tail coiling (STC) frequency and **B)** maximum amplitude of tail coiling in 22 hpf *fmn2b*<sup>+/+</sup> (n=121) and



606 *fmn2b*<sup>Δ4/Δ7</sup> (n=68) embryos. **C**) Trajectories of 2 dpf *fmn2b*<sup>+/+</sup> (grey traces; n=22) and  
607 *fmn2b*<sup>Δ4/Δ7</sup> (pink traces; n=24) embryos in Touch Evoked escape response (TEER),  
608 re-centered to a common origin for representation. The x and y axes in the plot  
609 correspond to the pixel values corresponding to coordinates of the fish from  
610 consecutively acquired frames. Quantification of **D**) distance covered per swim bout,  
611 **E**) average speed during the swim bout, and **F**) maximum instantaneous swimming  
612 speed of 2 dpf *fmn2b*<sup>+/+</sup> (n=22) and *fmn2b*<sup>Δ4/Δ7</sup> (n=24) embryos in response to a tactile  
613 stimulus. (\*\*\*\* p-value <0.0001; ns- not significant; Mann-Whitney U test)  
614

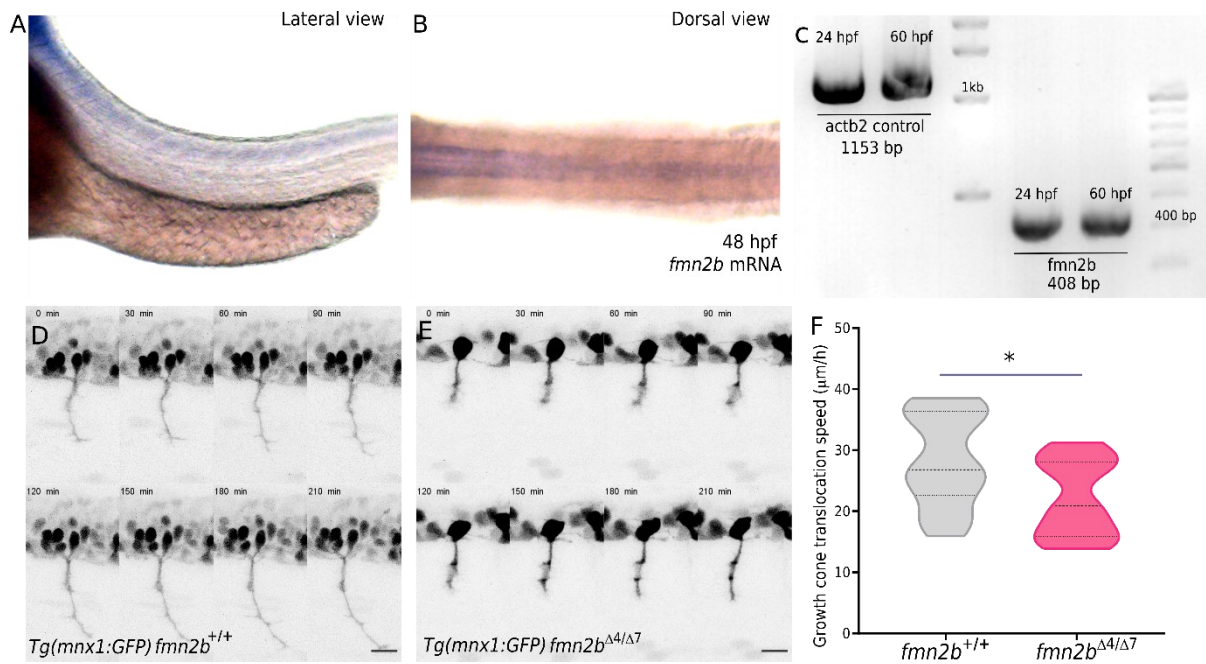

615

616 **Figure 3. *fmn2b* is expressed in the spinal cord and motor neurons of zebrafish**

617 **embryos. *fmn2b* is required for motor neuron growth cone translocation**

618 **A) Lateral and B) dorsal views of a representative 60 hpf embryo showing *fmn2b***

619 **mRNA expression in the spinal cord. C) Gel showing bands for amplified  $\beta$ 2-actin**

620 **(*actb2*) control and *fmn2b* from cDNA obtained from FACS sorted motor neurons**

621 **(*mnx1:GFP* positive cells) isolated from 24 hpf and 60 hpf wild-type *Tg(mnx1:GFP)***

622 **embryos. D) Representative montages of live imaging of growth cone translocation in**

623 ***fmn2b<sup>+/+</sup>* and E) *fmn2b<sup>Δ4/Δ7</sup>* embryos in the background of *Tg(mnx1:GFP)* during the**

624 **time period of 22 hpf to 26 hpf. F) Quantification of motor neuron growth cone**

625 **translocation speed in *fmn2b<sup>+/+</sup>* (n=15 growth cones; N=3 embryos) and *fmn2b<sup>Δ4/Δ7</sup>***

626 **(n=16 growth cones; N=4 embryos). (\* p-value = 0.0298; Mann-Whitney U test). Scale**

627 **bar is equivalent to 20  $\mu\text{m}$ .**

628

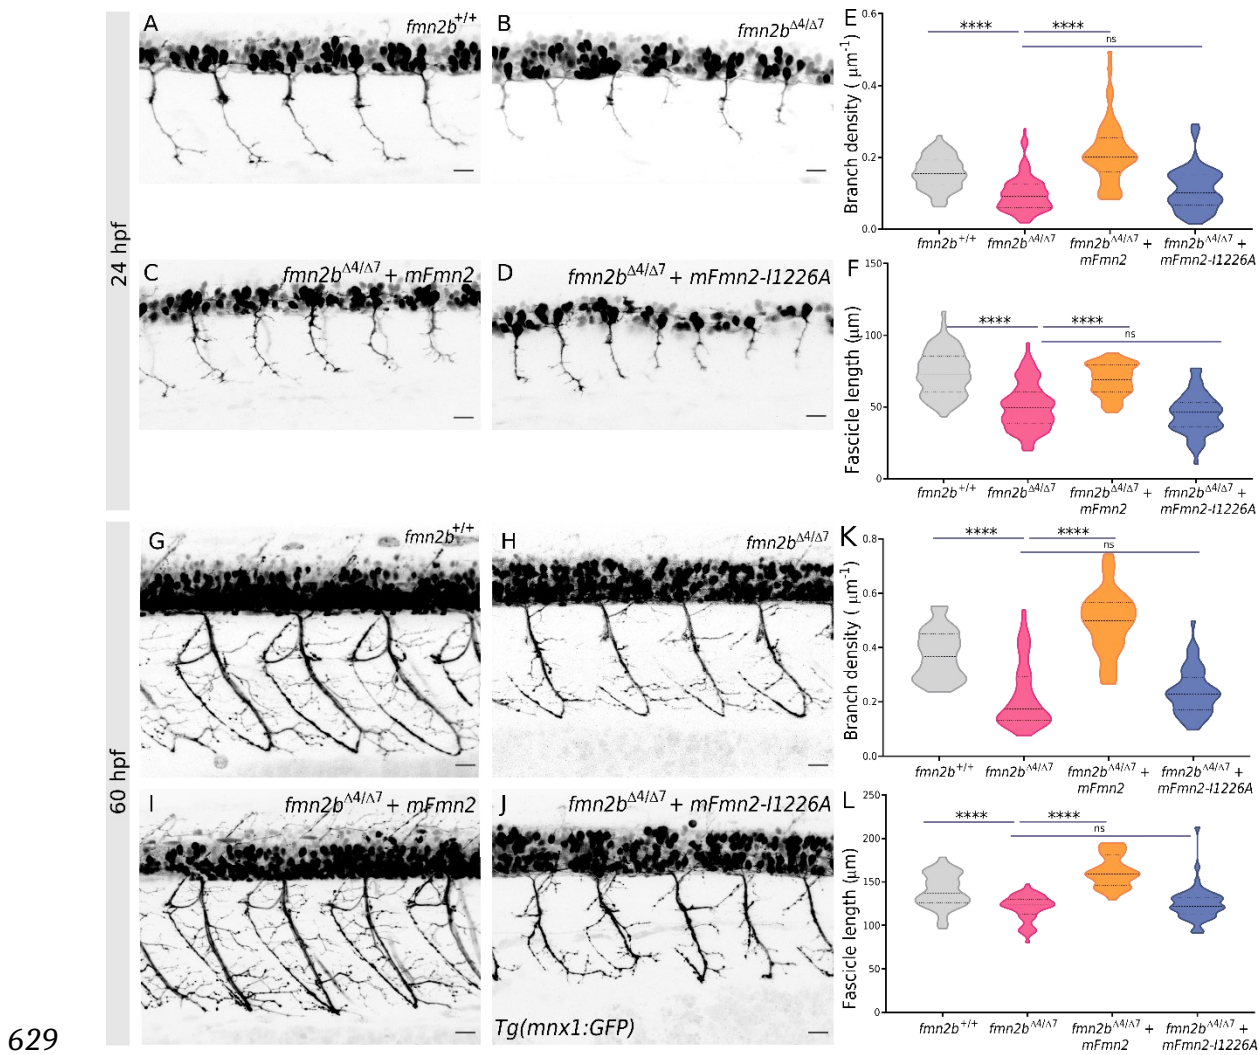

629

630 **Figure 4. Motor neuron outgrowth and branching defects in *fmn2b* mutants**

631 Representative micrographs of motor neurons labelled by *Tg(mnx1:GFP)* in 24 hpf **A)**

632 *fmn2b*<sup>+/+</sup> and **B)** *fmn2b*<sup>Δ4/Δ7</sup> and 60 hpf **G)** *fmn2b*<sup>+/+</sup> and **H)** *fmn2b*<sup>Δ4/Δ7</sup> embryos. Motor

633 neurons visualized by *Tg(mnx1:GFP)* in *fmn2b*<sup>Δ4/Δ7</sup> mutant embryos injected at 1-cell

634 stage with full-length mouse Fmn2 (mFmn2) mRNA at **C)** 24 hpf and **I)** 60 hpf and

635 nucleation dead mouse Fmn2 (mFmn2-I1226A) mRNA at **D)** 24 hpf and **J)** 60 hpf. **E)**

636 Quantification of branch density (number of branches per fascicle normalized to the

637 fascicle length) per myotome hemisegment in 24 hpf *fmn2b*<sup>+/+</sup> ( $0.1571 \pm 0.005 \mu\text{m}^{-1}$ ;

638  $n=70$  hemisegments) and *fmn2b*<sup>Δ4/Δ7</sup> embryos ( $0.0981 \pm 0.005 \mu\text{m}^{-1}$ ;  $n=118$

639 hemisegments). The defects were rescued in *fmn2b*<sup>Δ4/Δ7</sup> embryos injected with

640 mFmn2 mRNA ( $0.2139 \pm 0.012 \mu\text{m}^{-1}$ ; n=51 hemisegments) but not in the embryos  
641 injected with mFmn2-I1226A mRNA ( $0.111 \pm 0.007 \mu\text{m}^{-1}$ ; n=63 hemisegments). **F)**  
642 Quantification of fascicle length extended by motor neurons per myotome  
643 hemisegment in 24 hpf *fmn2b*<sup>+/+</sup> ( $68.97 \pm 1.55 \mu\text{m}$ ; n=70 hemisegments) and  
644 *fmn2b* <sup>$\Delta 4/\Delta 7$</sup>  embryos ( $44.98 \pm 1.756 \mu\text{m}$ ; n=118 hemisegments). The defects were  
645 rescued in *fmn2b* <sup>$\Delta 4/\Delta 7$</sup>  embryos injected with mFmn2 mRNA ( $73.7 \pm 1.86 \mu\text{m}$ ; n=51  
646 hemisegments) but not in the embryos injected with mFmn2-I1226A mRNA ( $73.7 \pm$   
647  $1.86 \mu\text{m}$ ; n=63 hemisegments). **K)** Quantification of branch density (number of  
648 branches per fascicle normalized to the fascicle length) per myotome hemisegment in  
649 60 hpf *fmn2b*<sup>+/+</sup> ( $0.3746 \pm 0.014 \mu\text{m}^{-1}$ ; n=37 hemisegments) and *fmn2b* <sup>$\Delta 4/\Delta 7$</sup>  embryos  
650 ( $0.2211 \pm 0.015 \mu\text{m}^{-1}$ ; n=57 hemisegments). The defects were rescued in *fmn2b* <sup>$\Delta 4/\Delta 7$</sup>   
651 embryos injected with mFmn2 mRNA ( $0.4955 \pm 0.021 \mu\text{m}^{-1}$ ; n=30 hemisegments) but  
652 not in the embryos injected with mFmn2-I1226A mRNA ( $0.2369 \pm 0.012 \mu\text{m}^{-1}$ ; n=48  
653 hemisegments). **L)** Quantification of fascicle length extended by motor neurons per  
654 myotome hemisegment in 60 hpf *fmn2b*<sup>+/+</sup> ( $139.6 \pm 3.21 \mu\text{m}$ ; n=37 hemisegments) and  
655 *fmn2b* <sup>$\Delta 4/\Delta 7$</sup>  embryos ( $120.4 \pm 1.94 \mu\text{m}$ ; n=57 hemisegments). The defects were  
656 rescued in *fmn2b* <sup>$\Delta 4/\Delta 7$</sup>  embryos injected with mFmn2 mRNA ( $162.7 \pm 3.38 \mu\text{m}$ ; n=30  
657 hemisegments) but not in the embryos injected with mFmn2-I1226A mRNA ( $124.7 \pm$   
658  $2.81 \mu\text{m}$ ; n=48 hemisegments). (\*\*\*\* p-value <0.0001; ns - not significant; Kruskal  
659 Wallis test followed by Dunn's post-hoc analysis). Scale bar is equivalent to 20  $\mu\text{m}$ .  
660

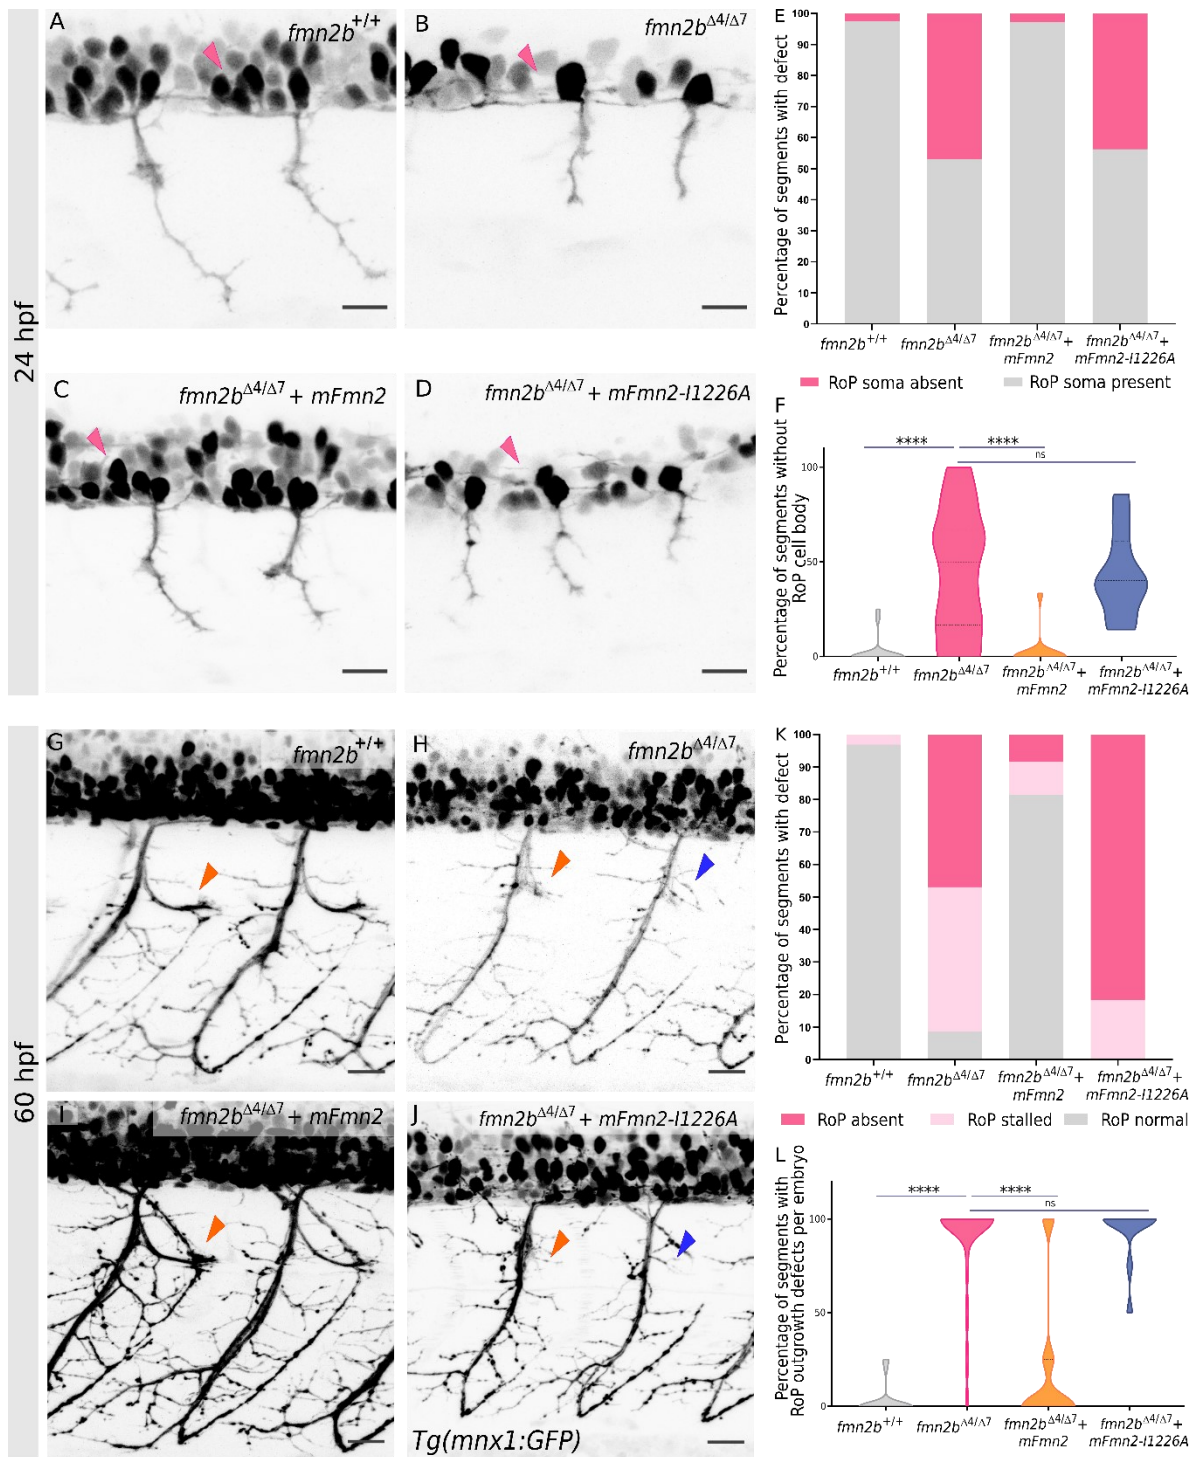

661

662 **Figure 5. RoP soma and lateral innervation of the myotome by RoP are affected**  
 663 **in *fmn2b* mutants**

664 Representative micrographs of motor neurons labelled by *Tg(mnx1:GFP)* in 24 hpf **A)**  
 665 *fmn2b<sup>+/+</sup>* and **B)** *fmn2b<sup>Δ4/Δ7</sup>* embryos. Representative micrographs of motor neurons  
 666 labelled by *Tg(mnx1:GFP)* in 24 hpf old *fmn2b<sup>Δ4/Δ7</sup>* mutant embryos injected at 1-cell

667 stage with **C**) full-length mouse Fmn2 (mFmn2) mRNA and **D**) nucleation dead  
668 version, mFmn2-I1226A mRNA. The pink arrowheads indicate the RoP soma or its  
669 expected position. **E**) Bar graph summarizing the percentage of embryos with defects  
670 in RoP soma in 24 hpf *fmn2b<sup>+/+</sup>* (n=18) and *fmn2b<sup>Δ4/Δ7</sup>* embryos (n=23). The defects  
671 were rescued in *fmn2b<sup>Δ4/Δ7</sup>* embryos injected with mFmn2 mRNA (n=12) but not in the  
672 embryos injected with mFmn2-I1226A mRNA (n=10).  $\chi^2$  test of independence shows  
673 significant difference between the four groups,  $\chi^2$  (df = 3) = 101.8,  $p < 0.0001$ . **F**) Violin  
674 plots depicting the variation in data summarized in the bar graphs for 24 hpf embryos.  
675 (\*\*\*\* p-value < 0.0001; ns - not significant; Kruskal Wallis test followed by Dunn's post-  
676 hoc analysis). Scale bar is equivalent to 20  $\mu$ m.

677 Representative micrographs of motor neurons labelled by *Tg(mnx1:GFP)* in 60 hpf **G**)  
678 *fmn2b<sup>+/+</sup>* and **H**) *fmn2b<sup>Δ4/Δ7</sup>* embryos. Representative micrographs of motor neurons  
679 labelled by *Tg(mnx1:GFP)* in 60 hpf old *fmn2b<sup>Δ4/Δ7</sup>* mutant embryos injected at 1-cell  
680 stage with **I**) full-length mouse Fmn2 (mFmn2) mRNA and **J**) nucleation dead version,  
681 mFmn2-I1226A mRNA. The orange arrowheads point towards the stalled RoP and the  
682 blue arrowheads indicate no RoP outgrowth. **K**) Bar graphs summarizing the  
683 percentage of embryos with defects in RoP axon outgrowth in 60 hpf *fmn2b<sup>+/+</sup>* (n=22)  
684 and *fmn2b<sup>Δ4/Δ7</sup>* embryos (n=26). The defects were rescued in *fmn2b<sup>Δ4/Δ7</sup>* embryos  
685 injected with mFmn2 mRNA (n=14) but not in the embryos injected with mFmn2-  
686 I1226A mRNA (n=13).  $\chi^2$  test of independence shows significant difference between  
687 the four groups,  $\chi^2$  (df = 6) = 332.7,  $p < 0.0001$ . **L**) Violin plots depicting the variation  
688 in data summarized in the bar graphs for 60 hpf embryos. (\*\*\*\* p-value < 0.0001; ns -  
689 not significant; Kruskal Wallis test followed by Dunn's post-hoc analysis) Scale bar is  
690 equivalent to 20  $\mu$ m.

691

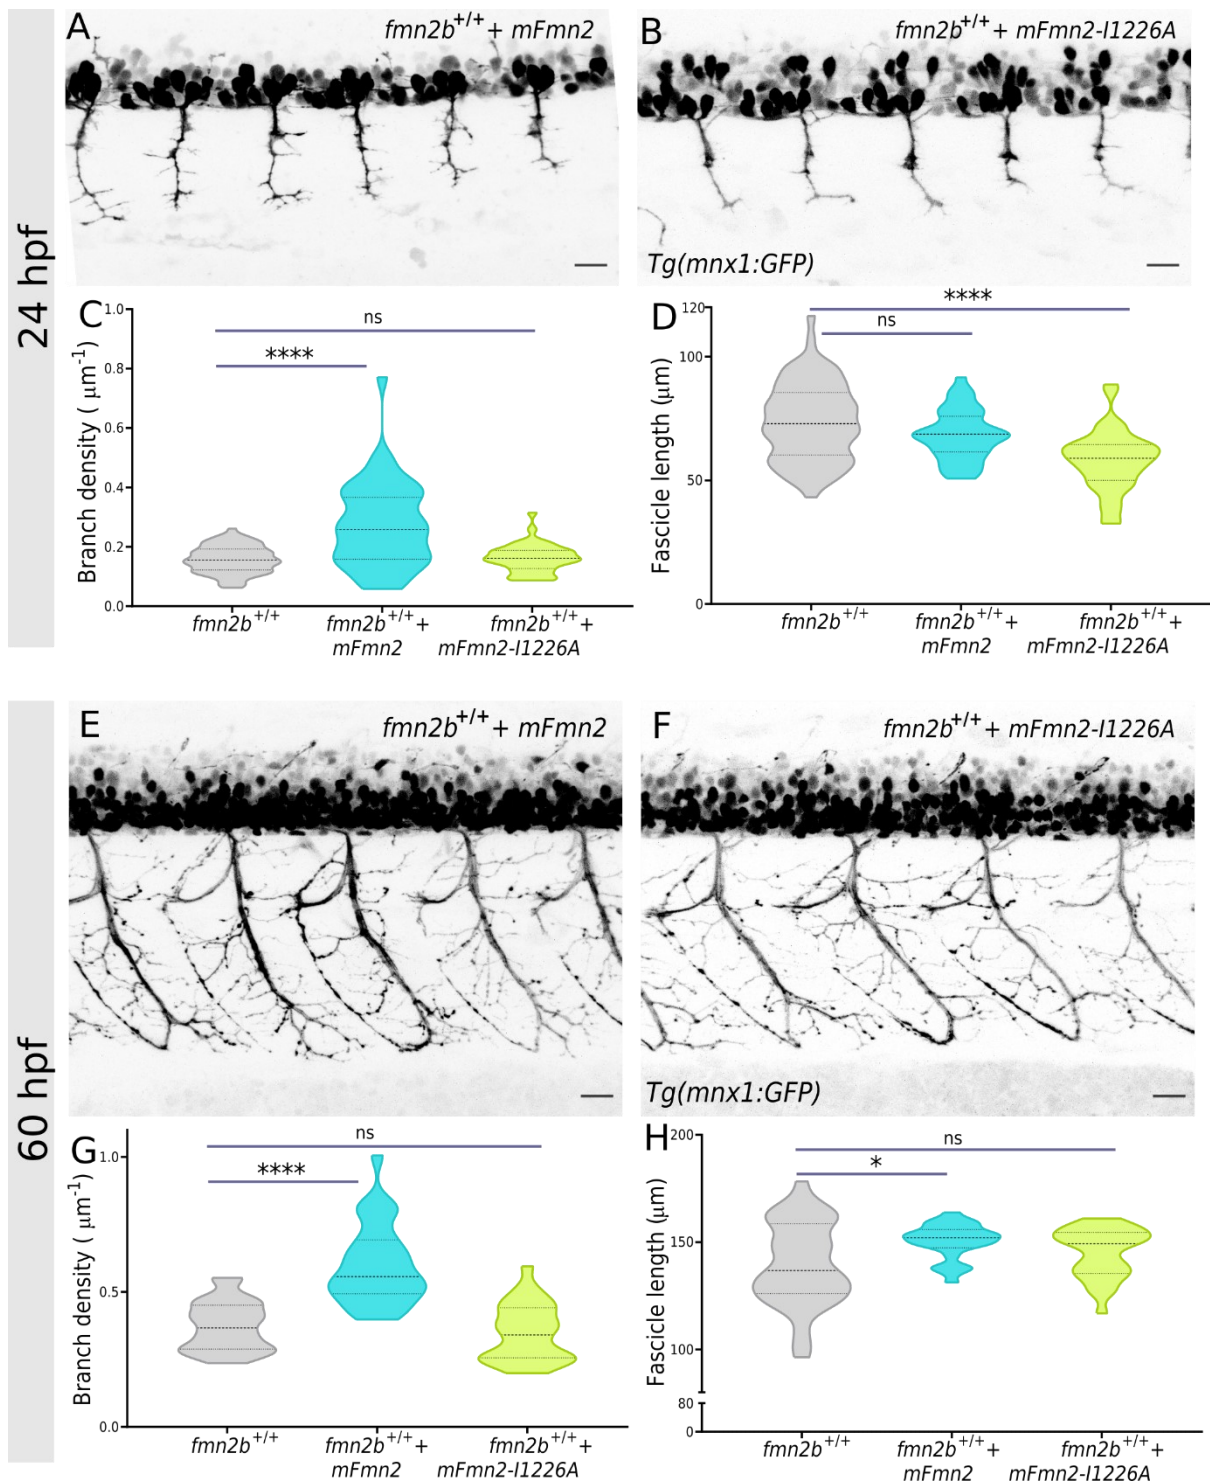

692

693 **Figure 6. Outgrowth and branching phenotypes upon overexpression of mouse**

694 **Fmn2 in wild-type embryos**

695 Representative micrographs of motor neurons labelled by *Tg(mnx1:GFP)* in 24 hpf old

696 *fmn2b<sup>+/+</sup>* embryos injected with **A)** mFmn2 mRNA and **B)** mFmn2-I1226A mRNA. **C)**

697 Quantification of branch density (number of branches per fascicle normalized to the  
698 fascicle length) along the fascicle extended by motor neurons per myotome  
699 hemisegment in *fmn2b<sup>+/+</sup>* embryos injected with mFmn2 mRNA ( $0.2728 \pm 0.0217 \mu\text{m}^{-1}$ ;  
700  $n=40$  hemisegments) and mFmn2-I1226A mRNA ( $0.1617 \pm 0.007 \mu\text{m}^{-1}$ ;  $n=40$   
701 hemisegments). **D)** Quantification of fascicle length extended by motor neurons per  
702 myotome hemisegment in *fmn2b<sup>+/+</sup>* embryos injected with mFmn2 mRNA ( $73.7 \pm 1.86$   
703  $\mu\text{m}$ ;  $n=40$  hemisegments) and mFmn2-I1226A mRNA ( $68.3 \pm 1.603 \mu\text{m}$ ;  $n=40$   
704 hemisegments). Representative micrographs of motor neurons labelled by  
705 *Tg(mnx1:GFP)* in 60 hpf old *fmn2b<sup>+/+</sup>* embryos injected with **E)** mFmn2 mRNA and **F)**  
706 mFmn2-I1226A mRNA. **G)** Quantification of branch density (number of branches per  
707 fascicle normalized to the fascicle length) along the fascicle extended by motor  
708 neurons per myotome hemisegment in 60 hpf *fmn2b<sup>+/+</sup>* embryos injected with mFmn2  
709 mRNA ( $0.599 \pm 0.027 \mu\text{m}^{-1}$ ;  $n=28$  hemisegments) and mFmn2-I1226A mRNA ( $0.3481$   
710  $\pm 0.02 \mu\text{m}^{-1}$ ;  $n=28$  hemisegments). **H)** Quantification of fascicle length extended by  
711 motor neurons per myotome hemisegment in 60 hpf *fmn2b<sup>+/+</sup>* embryos injected with  
712 mFmn2 mRNA ( $150.4 \pm 1.536 \mu\text{m}$ ;  $n=28$  hemisegments) and mFmn2-I1226A mRNA  
713 ( $145 \pm 2.18 \mu\text{m}$ ;  $n=28$  hemisegments). (\*\*\*\* p-value <0.0001; \* p-value = 0.0175; ns -  
714 not significant; Kruskal Wallis test followed by Dunn's post-hoc analysis) Scale bar is  
715 equivalent to 20  $\mu\text{m}$ .

716



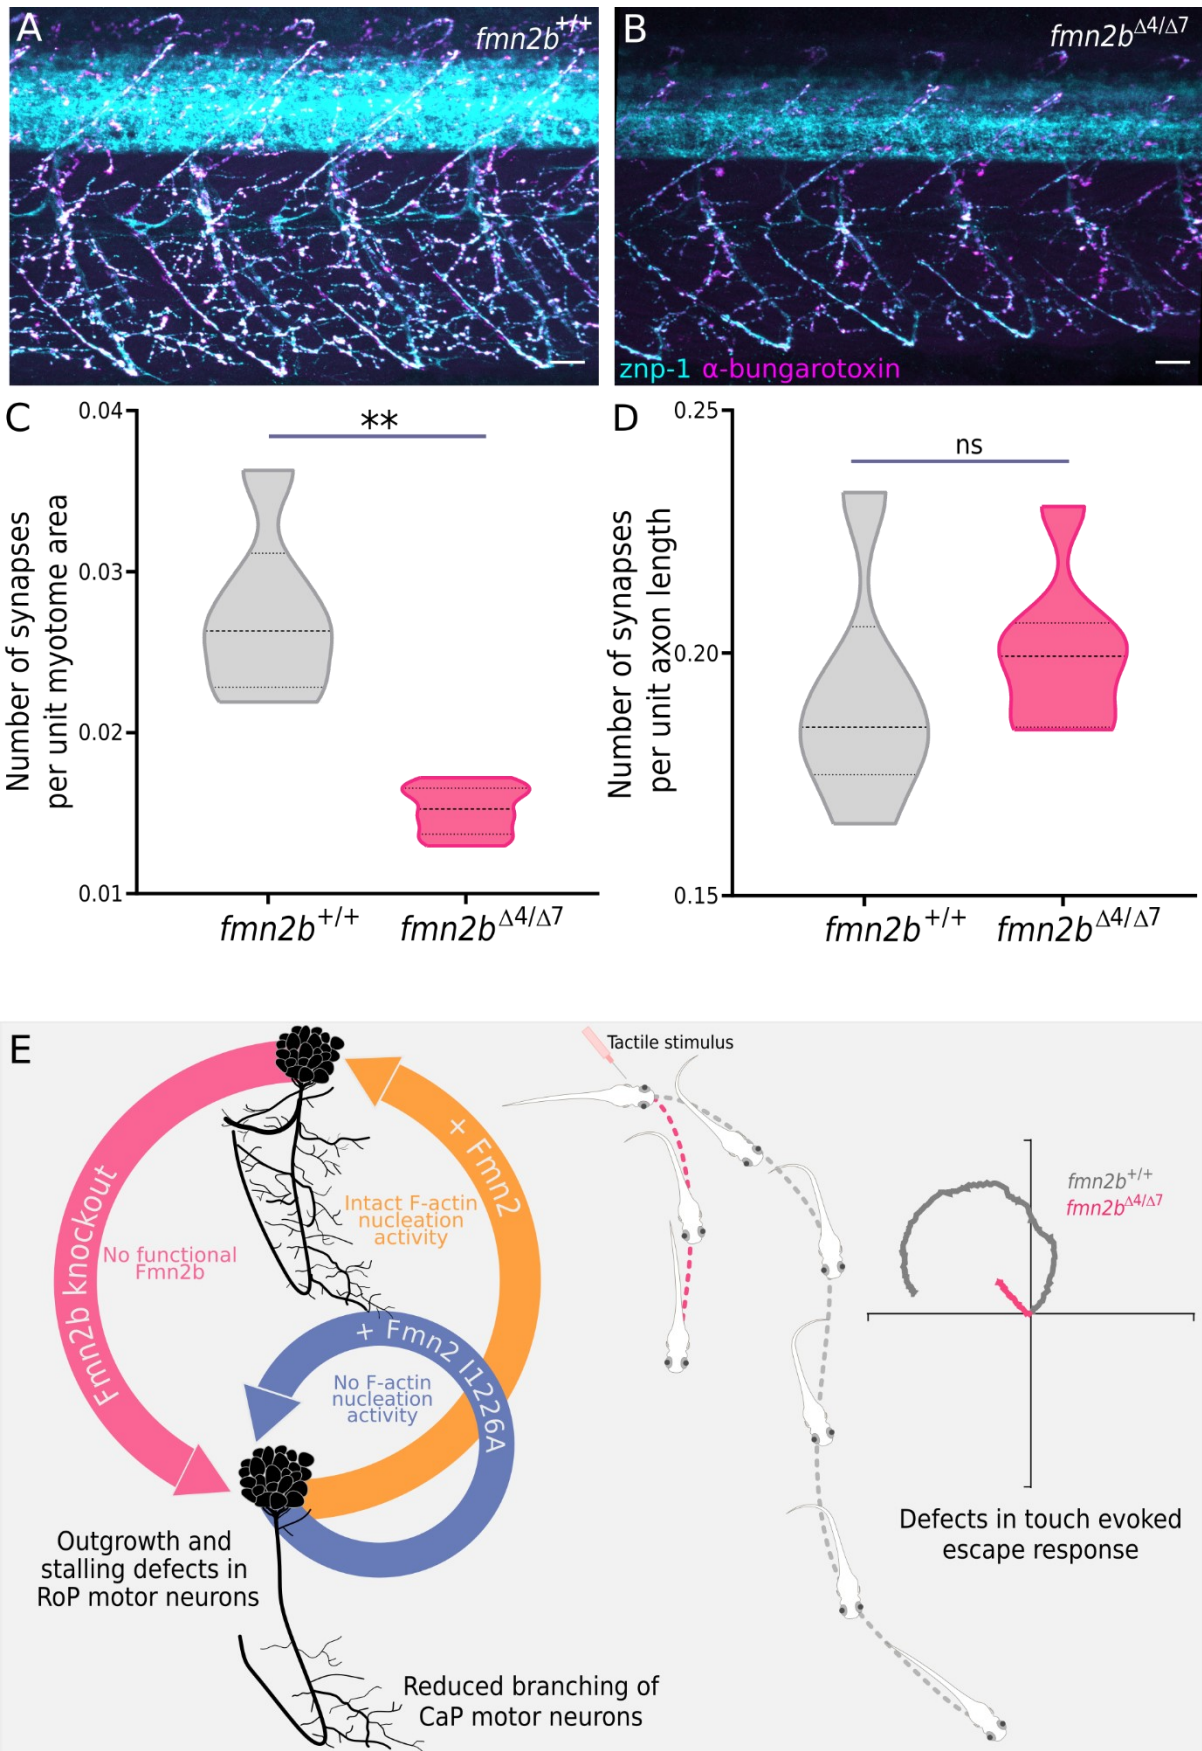

717

718 **Figure 7. Synapse coverage in *fmn2b* mutants**

719 Representative micrographs of 60 hpf **A)** *fmn2b*<sup>+/+</sup> (n=6) **B)** *fmn2b*<sup>Δ4/Δ7</sup> embryos (n=7)  
720 co-stained with znp-1 antibody and α-bungarotoxin. Quantification of colocalization of  
721 znp-1 and α-bungarotoxin in NMJ structures of 60 hpf embryos. **C)** Number of  
722 synapses per unit myotome area in *fmn2b*<sup>+/+</sup> (0.0272 ±0.002; n=6) and *fmn2b*<sup>Δ4/Δ7</sup>  
723 embryos (0.01521 ±0.0005; n=7, \*\*p-value=0.0012). **D)** Number of synapses per unit  
724 axon length in *fmn2b*<sup>+/+</sup> (0.1903± 0.009; n=6) and *fmn2b*<sup>Δ4/Δ7</sup> embryos (0.2001± 0.005;  
725 n=7). (ns- not significant; Mann Whitney U test) Scale bar is equivalent to 20 μm. **E)**  
726 Depletion of Fmn2b causes outgrowth and branching defects in motor neurons in  
727 zebrafish larvae causing defects in motor behaviours. The outgrowth and branching  
728 defects in *fmn2b* mutants can be rescued by expression of full-length mouse Fmn2 in  
729 the mutants highlighting the requirement and conserved function of Fmn2 in  
730 development of motor neurons *in vivo*. The inability of mFmn2-I1226A to rescue the  
731 defects in *fmn2b* mutants underscores the requirement of the F-actin nucleation  
732 activity of Fmn2 in outgrowth and branching of motor neurons. The blue and orange  
733 curved arrows indicate the rescue experiments with full length mFmn2 and nucleation  
734 dead mFmn2-I1226A in the *fmn2b* mutant background respectively. The grey and pink  
735 traces indicate the trajectories of wildtype and *fmn2b* mutant embryos respectively in  
736 response to tactile stimulus. The schematic is not drawn to scale.

## 737 REFERENCES

- 738 Agís-Balboa RC et al. (2017) Formin 2 links neuropsychiatric phenotypes at young  
739 age to an increased risk for dementia. *EMBO J* 36:2815–2828.
- 740 Ahuja R, Pinyol R, Reichenbach N, Custer L, Klingensmith J, Kessels MM, Qualmann  
741 B (2007) Cordon-Bleu Is an Actin Nucleation Factor and Controls Neuronal  
742 Morphology. *Cell* 131:337–350.
- 743 Armijo-Weingart L, Gallo G (2017) It takes a village to raise a branch: Cellular  
744 mechanisms of the initiation of axon collateral branches. *Mol Cell Neurosci* 84:36–  
745 47.
- 746 Atkins M, Gasmi L, Bercier V, Revenu C, Del Bene F, Hazan J, Fassier C (2019)  
747 FIGNL1 associates with KIF1B $\beta$  and BICD1 to restrict dynein transport velocity  
748 during axon navigation. *J Cell Biol* 218:3290–3306.
- 749 Bagnall MW, McLean DL (2014) Modular Organization of Axial Microcircuits in  
750 Zebrafish. *Science* (80- ) 343:197–200.
- 751 Balasanyan V, Watanabe K, Dempsey WP, Lewis TL, Trinh LA, Arnold DB (2017)  
752 Structure and Function of an Actin-Based Filter in the Proximal Axon. *Cell Rep*  
753 21:2696–2705.
- 754 Beattie CE, Hatta K, Halpern ME, Liu H, Eisen JS, Kimmel CB (1997) Temporal  
755 separation in the specification of primary and secondary motoneurons in  
756 zebrafish. *Dev Biol* 187:171–182.
- 757 Bello-Rojas S, Istrate AE, Kishore S, McLean DL (2019) Central and peripheral  
758 innervation patterns of defined axial motor units in larval zebrafish. *J Comp Neurol*  
759 527:2557–2572.

- 760 Bernhardt RR, Chitnis AB, Lindamer L, Kuwada JY (1990) Identification of spinal  
761 neurons in the embryonic and larval zebrafish. *J Comp Neurol* 302:603–616.
- 762 Bresciani E, Broadbridge E, Liu PP (2018) An efficient dissociation protocol for  
763 generation of single cell suspension from zebrafish embryos and larvae.  
764 *MethodsX* 5:1287–1290.
- 765 Brustein E, Saint-Amant L, Buss RR, Chong M, McDearmid JR, Drapeau P (2003)  
766 Steps during the development of the zebrafish locomotor network. *J Physiol Paris*  
767 97:77–86.
- 768 Carrington B, Varshney GK, Burgess SM, Sood R (2015) CRISPR-STAT: An easy and  
769 reliable PCR-based method to evaluate target-specific sgRNA activity. *Nucleic*  
770 *Acids Res* 43:e157.
- 771 Chia PH, Chen B, Li P, Rosen MK, Shen K (2014) Local F-actin network links synapse  
772 formation and axon branching. *Cell* 156:208–220.
- 773 Coles CH, Bradke F (2015) Coordinating Neuronal Actin-Microtubule Dynamics. *Curr*  
774 *Biol* 25:R677–R691.
- 775 Colombo A, Palma K, Armijo L, Mione M, Signore IA, Morales C, Guerrero N, Meynard  
776 MM, Pérez R, Suazo J, Marcelain K, Briones L, Härtel S, Wilson SW, Concha ML  
777 (2013) Daam1a mediates asymmetric habenular morphogenesis by regulating  
778 dendritic and axonal outgrowth. *Dev* 140:3997–4007.
- 779 Das R, Bhattacharjee S, Letcher JM, Harris JM, Nanda S, Foldi I, Lottes EN, Bobo  
780 HM, Grantier BD, Mihály J, Ascoli GA, Cox DN (2021) Formin3 directs dendritic  
781 architecture via microtubule regulation and is required for somatosensory  
782 nociceptive behavior. *Development*.
- 783 Dent EW, Gupton SL, Gertler FB (2011) The growth cone cytoskeleton in Axon

- 784 outgrowth and guidance. *Cold Spring Harb Perspect Biol* 3:1–39.
- 785 Dickson BJ (2002) Molecular mechanisms of axon guidance. *Science* (80- ) 298:1959–  
786 1964.
- 787 Drapeau P, Saint-Amant L, Buss RR, Chong M, McDearmid JR, Brustein E (2002)  
788 Development of the locomotor network in zebrafish. *Prog Neurobiol* 68:85–111.
- 789 Eisen JS, Myers PZ, Westerfield M (1986) Pathway selection by growth cones of  
790 identified motoneurons in live zebra fish embryos. *Nature* 320:269–271.
- 791 Fassier C, Fréal A, Gasmi L, Delphin C, Ten Martin D, De Gois S, Tambalo M, Bosc  
792 C, Mailly P, Revenu C, Peris L, Bolte S, Schneider-Maunoury S, Houart C,  
793 Nothias F, Larcher J-C, Andrieux A, Hazan J (2018) Motor axon navigation relies  
794 on Fidgetin-like 1-driven microtubule plus end dynamics. *J Cell Biol* 217:1719–  
795 1738.
- 796 Flanagan-Steet H, Fox MA, Meyer D, Sanes JR (2005) Neuromuscular synapses can  
797 form in vivo by incorporation of initially aneural postsynaptic specializations.  
798 *Development* 132:4471–4481.
- 799 Flynn KC, Bradke F (2020) Role of the cytoskeleton and membrane trafficking in axon–  
800 dendrite morphogenesis. In: *Cellular Migration and Formation of Axons and*  
801 *Dendrites*, pp 21–56. Elsevier.
- 802 Gallo G (2011) The cytoskeletal and signaling mechanisms of axon collateral  
803 branching. *Dev Neurobiol* 71:201–220.
- 804 Gallo G (2016) Coordination of the axonal cytoskeleton during the emergence of axon  
805 collateral branches. *Neural Regen Res* 11:709–711.
- 806 Ghate K, Mutalik SP, Sthanam LK, Sen S, Ghose A (2020) Fmn2 Regulates Growth

- 807 Cone Motility by Mediating a Molecular Clutch to Generate Traction Forces.  
808 Neuroscience 448:160–171.
- 809 González-Fraga J, Dipp-Alvarez V, Bardullas U (2019) Quantification of Spontaneous  
810 Tail Movement in Zebrafish Embryos Using a Novel Open-Source MATLAB  
811 Application. Zebrafish 16:214–216.
- 812 Goode BL, Eck MJ (2007) Mechanism and Function of Formins in the Control of Actin  
813 Assembly. Annu Rev Biochem 76:593–627.
- 814 Gordon-Weeks PR, Fournier AE (2014) Neuronal cytoskeleton in synaptic plasticity  
815 and regeneration. J Neurochem 129:206–212.
- 816 Gorukmez O, Gorukmez O, Ekici A (2020) A Novel Nonsense FMN2 Mutation in  
817 Nonsyndromic Autosomal Recessive Intellectual Disability Syndrome. Fetal  
818 Pediatr Pathol.
- 819 Hale ME, Ritter D a., Fetcho JR (2001) A confocal study of spinal interneurons in living  
820 larval zebrafish. J Comp Neurol 437:1–16.
- 821 Hu J, Bai X, Bowen JR, Dolat L, Korobova F, Yu W, Baas PW, Svitkina T, Gallo G,  
822 Spiliotis ET (2012) Septin-driven coordination of actin and microtubule remodeling  
823 regulates the collateral branching of axons. Curr Biol 22:1109–1115.
- 824 Kessels MM, Schwintzer L, Schlobinski D, Qualmann B (2011) Controlling actin  
825 cytoskeletal organization and dynamics during neuronal morphogenesis. Eur J  
826 Cell Biol 90:926–933.
- 827 Ketschek A, Gallo G (2010) Nerve Growth Factor Induces Axonal Filopodia through  
828 Localized Microdomains of Phosphoinositide 3-Kinase Activity That Drive the  
829 Formation of Cytoskeletal Precursors to Filopodia. J Neurosci 30:12185–12197.

- 830 Ketschek A, Jones S, Spillane M, Korobova F, Svitkina T, Gallo G (2015) Nerve growth  
831 factor promotes reorganization of the axonal microtubule array at sites of axon  
832 collateral branching. *Dev Neurobiol* 75:1441–1461.
- 833 Ketschek A, Spillane M, Dun XP, Hardy H, Chilton J, Gallo G (2016) Drebrin  
834 coordinates the actin and microtubule cytoskeleton during the initiation of axon  
835 collateral branches. *Dev Neurobiol* 76:1092–1110.
- 836 Kimmel CB, Ballard WW, Kimmel SR, Ullmann B, Schilling TF (1995) Stages of  
837 embryonic development of the zebrafish. *Dev Dyn* 203:253–310.
- 838 Kundu T, Das SS, Kumar DS, Sewatkar LK, Ghose A (2020) Antagonistic activities of  
839 Fmn2 and ADF regulate axonal F-actin patch dynamics and the initiation of  
840 collateral branching. *bioRxiv:2020.11.16.384099*.
- 841 Kundu T, Dutta P, Nagar D, Maiti S, Ghose A (2021) Coupling of dynamic microtubules  
842 to F-actin by Fmn2 regulates chemotaxis of neuronal growth cones. *J Cell Sci*.
- 843 Kuwada JY (1993) Pathway selection by growth cones in the zebrafish central nervous  
844 system. *Perspect Dev Neurobiol* 1:195–203.
- 845 LaFave MC, Varshney GK, Vemulapalli M, Mullikin JC, Burgess SM (2014) A Defined  
846 Zebrafish Line for High-Throughput Genetics and Genomics: NHGRI-1. *Genetics*  
847 198:167–170.
- 848 Langebeck-Jensen K, Shahar OD, Schuman EM, Langer JD, Ryu S (2019) Larval  
849 Zebrafish Proteome Regulation in Response to an Environmental Challenge.  
850 *Proteomics* 19:1900028.
- 851 Law R et al. (2014) Biallelic truncating mutations in FMN2, encoding the actin-  
852 regulatory protein formin 2, cause nonsyndromic autosomal-recessive intellectual  
853 disability. *Am J Hum Genet* 95:721–728.

- 854 Leader B, Leder P (2000) Formin-2, a novel formin homology protein of the cappuccino  
855 subfamily, is highly expressed in the developing and adult central nervous system.
- 856 Lewis TL, Courchet J, Polleux F (2013) Cellular and molecular mechanisms underlying  
857 axon formation, growth, and branching. *J Cell Biol* 202:837–848.
- 858 Lian G, Dettenhofer M, Lu J, Downing M, Chenn A, Wong T, Sheen V (2016) Filamin  
859 A- and formin 2-dependent endocytosis regulates proliferation via the canonical  
860 wnt pathway. *Dev* 143:4509–4520.
- 861 Liu LYM, Lin MH, Lai ZY, Jiang JP, Huang YC, Jao LE, Chuang YJ (2016) Motor  
862 neuron-derived *Thsd7a* is essential for zebrafish vascular development via the  
863 Notch-dll4 signaling pathway. *J Biomed Sci* 23:1–11.
- 864 Lowery LA, Van Vactor D (2009) The trip of the tip: understanding the growth cone  
865 machinery. *Nat Rev Mol Cell Biol* 10:332–343.
- 866 Marco EJ, Aitken AB, Nair VP, da Gente G, Gerdes MR, Bologlu L, Thomas S, Sherr  
867 EH (2018) Burden of de novo mutations and inherited rare single nucleotide  
868 variants in children with sensory processing dysfunction. *BMC Med Genomics*  
869 11:50.
- 870 Matussek T, Gombos R, Szécsényi A, Sánchez-Soriano N, Czibula Á, Pataki C, Gedai  
871 A, Prokop A, Raskó I, Mihály J (2008) Formin Proteins of the DAAM Subfamily  
872 Play a Role during Axon Growth. *J Neurosci* 28:13310 LP – 13319.
- 873 McLean DL, Fetcho JR (2008) Using imaging and genetics in zebrafish to study  
874 developing spinal circuits in vivo. *Dev Neurobiol* 68:817–834.
- 875 Melançon E, Liu DWC, Westerfield M, Eisen JS (1997) Pathfinding by identified  
876 zebrafish motoneurons in the absence of muscle pioneers. *J Neurosci* 17:7796–  
877 7804.



- 878 Menelaou E, Svoboda KR (2009) Secondary motoneurons in juvenile and adult  
879 zebrafish: Axonal pathfinding errors caused by embryonic nicotine exposure. *J*  
880 *Comp Neurol* 512:305–322.
- 881 Menon S, Gupton S (2018) Recent advances in branching mechanisms underlying  
882 neuronal morphogenesis .
- 883 Montaville P, Jégou A, Pernier J, Compper C, Guichard B, Mogessie B, Schuh M,  
884 Romet-Lemonne G, Carlier MF (2014) Spire and Formin 2 Synergize and  
885 Antagonize in Regulating Actin Assembly in Meiosis by a Ping-Pong Mechanism.  
886 *PLoS Biol* 12.
- 887 Montaville P, Kühn S, Compper C, Carlier MF (2016) Role of the C-terminal extension  
888 of formin 2 in its activation by spire protein and processive assembly of actin  
889 filaments. *J Biol Chem* 291:3302–3318.
- 890 Morello G, Guarnaccia M, Spampinato AG, La Cognata V, D’Agata V, Cavallaro S  
891 (2018) Copy Number Variations in Amyotrophic Lateral Sclerosis: Piecing the  
892 Mosaic Tiles Together through a Systems Biology Approach. *Mol Neurobiol*  
893 55:1299–1322.
- 894 Moreno-Mateos MA, Vejnar CE, Beaudoin J-D, Fernandez JP, Mis EK, Khokha MK,  
895 Giraldez AJ (2015) CRISPRscan: designing highly efficient sgRNAs for CRISPR-  
896 Cas9 targeting in vivo. *Nat Methods* 2015 1210 12:982–988.
- 897 Myers PZ, Eisen JS, Westerfield M (1986) Development and Axonal Outgrowth of  
898 Identified Motoneurons in the Zebrafish.
- 899 Nagar D, James TK, Mishra R, Guha S, Burgess SM, Ghose A (2021) The Formin  
900 Fmn2b Is Required for the Development of an Excitatory Interneuron Module in  
901 the Zebrafish Acoustic Startle Circuit. *eNeuro* 8:ENEURO.0329-20.2021.

- 902 Nithianandam V, Chien C-T (2018) Actin blobs prefigure dendrite branching sites. *J*  
903 *Cell Biol* 217:3731–3746.
- 904 Pamphlett R, Morahan JM, Luquin N, Yu B (2011) Looking for differences in copy  
905 number between blood and brain in sporadic amyotrophic lateral sclerosis.  
906 *Muscle Nerve* 44:492–498.
- 907 Perrone MD, Rocca MS, Bruno I, Faletra F, Pecile V, Gasparini P (2012) De novo 911  
908 Kb interstitial deletion on chromosome 1q43 in a boy with mental retardation and  
909 short stature. *Eur J Med Genet* 55:117–119.
- 910 Pike SH, Melancon EF, Eisen JS (1992) Pathfinding by zebrafish motoneurons in the  
911 absence of normal pioneer axons. *Development* 114:825–831.
- 912 Prokop A, Sánchez-Soriano N, Gonçalves-Pimentel C, Molnár I, Kalmár T, Mihály J  
913 (2011) DAAM family members leading a novel path into formin research. *Commun*  
914 *Integr Biol* 4:538–542.
- 915 Quinlan ME, Hilgert S, Bedrossian A, Mullins RD, Kerkhoff E (2007) Regulatory  
916 interactions between two actin nucleators, Spire and Cappuccino. *J Cell Biol*  
917 179:117–128.
- 918 Roth-Johnson EA, Vizcarra CL, Bois JS, Quinlan ME (2014) Interaction between  
919 microtubules and the drosophila formin cappuccino and its effect on actin  
920 assembly. *J Biol Chem* 289:4395–4404.
- 921 Sahasrabudhe A, Ghate K, Mutalik S, Jacob A, Ghose A (2016) Formin 2 regulates  
922 the stabilization of filopodial tip adhesions in growth cones and affects neuronal  
923 outgrowth and pathfinding in vivo. *Dev* 143:449–460.
- 924 Saint-Amant L, Drapeau P (1998) Time course of the development of motor behaviors  
925 in the zebrafish embryo. *J Neurobiol* 37:622–632.

- 926 Schymick JC, Scholz SW, Fung H-C, Britton A, Arepalli S, Gibbs JR, Lombardo F,  
927 Matarin M, Kasperaviciute D, Hernandez DG, Crews C, Bruijn L, Rothstein J,  
928 Mora G, Restagno G, Chiò A, Singleton A, Hardy J, Traynor BJ (2007) Genome-  
929 wide genotyping in amyotrophic lateral sclerosis and neurologically normal  
930 controls: first stage analysis and public release of data. *Lancet Neurol* 6:322–328.
- 931 Spillane M, Gallo G (2014) Involvement of Rho-family GTPases in axon branching.  
932 *Small GTPases* 5.
- 933 Spillane M, Ketschek A, Jones SL, Korobova F, Marsick B, Lanier L, Svitkina T, Gallo  
934 G (2011) The actin nucleating Arp2/3 complex contributes to the formation of  
935 axonal filopodia and branches through the regulation of actin patch precursors to  
936 filopodia. *Dev Neurobiol* 71:747–758.
- 937 Stifani N (2014) Motor neurons and the generation of spinal motor neuron diversity.  
938 *Front Cell Neurosci* 8:293.
- 939 Varshney GK, Carrington B, Pei W, Bishop K, Chen Z, Fan C, Xu L, Jones M, LaFave  
940 MC, Ledin J, Sood R, Burgess SM (2016) A high-throughput functional genomics  
941 workflow based on CRISPR/Cas9-mediated targeted mutagenesis in zebrafish.  
942 *Nat Protoc* 11:2357–2375.
- 943 Varshney GK, Pei W, Lafave MC, Idol J, Xu L, Gallardo V, Carrington B, Bishop K,  
944 Jones M, Li M, Harper U, Huang SC, Prakash A, Chen W, Sood R, Ledin J,  
945 Burgess SM (2015) High-throughput gene targeting and phenotyping in zebrafish  
946 using CRISPR/Cas9. *Genome Res* 25:1030–1042.
- 947 Westerfield M, McMurray J V., Eisen JS (1986) Identified motoneurons and their  
948 innervation of axial muscles in the zebrafish. *J Neurosci* 6:2267–2277.
- 949 Yoo H, Roth-Johnson EA, Bor B, Quinlan ME (2015) *Drosophila* Cappuccino alleles

950 provide insight into formin mechanism and role in oogenesis. Mol Biol Cell  
951 26:1875–1886.

## 952 **ACKNOWLEDGEMENTS**

953 The authors thank Dr. N. K. Subhedar (IISER Pune) for critical inputs on the  
954 manuscript. The authors acknowledge the IISER Pune Microscopy Facility, the  
955 National Facility for Gene Function in Health and Disease (NFGFHD) at IISER Pune  
956 and the zebrafish facility at NHGRI Zebrafish Core, NIH for access to equipment and  
957 infrastructure.

## 958 **FUNDING**

959 The study was supported from grants from the Council of Scientific and Industrial  
960 Research, Govt of India (37(1689)/17/EMR-II), Department of Biotechnology, Govt. of  
961 India (BT/PR26241/GET/119/244/2017) and intramural support from IISER Pune to  
962 A.G.. D.N. is supported by a fellowship from the Council of Scientific and Industrial  
963 Research, Govt of India. D.N. was awarded the Indo-U.S. GETin Internship  
964 (2018\_050) (Department of Biotechnology (DBT), Government of India and Indo US  
965 Science and Technology Forum (IUSSTF)) which supported the CRISPR Cas9  
966 mutagenesis work at NHGRI, NIH. The National Facility for Gene Function in Health  
967 and Disease (NFGFHD) at IISER Pune is supported by the Department of  
968 Biotechnology, Govt. of India (BT/INF/22/SP17358/2016). S.M.B. is supported by the  
969 Intramural Research Program of the National Human Genome Research Institute  
970 (ZIAHG200386-06).

971

972 **AUTHOR INFORMATION**

973 **AFFILIATIONS**

974 **1. Indian Institute of Science Education and Research (IISER) Pune, Dr Homi**  
975 **Bhabha Road, Pune 411008, INDIA**

976 Dhriti Nagar and Aurnab Ghose

977 **2. Zebrafish Core, Translational and Functional Genomics Branch, National**  
978 **Human Genome Research Institute, National Institutes of Health, Bethesda,**  
979 **Maryland, USA**

980 Blake Carrington

981 **3. Translational and Functional Genomics Branch, National Human Genome**  
982 **Research Institute (NHGRI), National Institutes of Health (NIH), Bethesda, MD,**  
983 **USA**

984 Shawn M Burgess

985

986 **CONTRIBUTION**

987 Conceptualization: D.N. and A.G.; Investigation and formal analysis: D.N.;  
988 Methodology and resources: B.C. and S.M.B.; Writing – original draft: D.N. and A.G.;  
989 Writing – review and editing: D.N., B.C., S.M.B. and A.G; Funding Acquisition: A.G..  
990 All authors gave final approval for publication and agreed to be held accountable for  
991 the work performed therein.

992 **CORRESPONDING AUTHORS**

993 Correspondence: Dr. Aurnab Ghose, Indian Institute of Science Education and  
994 Research (IISER) Pune, Dr Homi Bhabha Road, Pune 411008, INDIA.

995 Email: aurnab@iiserpune.ac.in

996

997 **ETHICS DECLARATIONS**

998 ***Ethics approval***

999 All zebrafish husbandry and experimental protocols complied with institutional  
1000 guidelines and were approved by the Institute Animal Ethics Committee (IAEC) and  
1001 the Institutional Biosafety Committee (IBSC), IISER Pune or a National Human  
1002 Genome Research Institute (NHGRI/NIH) Animal Care and Use Committee approved  
1003 animal study protocol.

1004 ***Consent for publication***

1005 All authors gave consent for publication.

1006 ***Competing interests***

1007 The authors declare no competing interests.
